# Supplementary material for: Water induced chromogenic and fluorogenic signal modulation in a bi-fluorophore appended acyclic amino-receptor system
Source: Royal Society of Chemistry journal article supplement (doi:10.1039/c0ob00238k), 2010-12-08
Supplement: c0ob00238k.pdf [file c0ob00238k.pdf]

# Water Induced Chromogenic and Fluorogenic Signal Modulation in a Bi-Fluorophore Appended Acyclic Amino-Receptor System

Bamaprasad Bag\* and Ajoy Pal

*Colloids and material Chemistry Department,  
Institute of Minerals and Materials Technology (CSIR),  
Bhubaneswar-751013 India  
Email: bpbag@immt.res.in*

## Supplementary data

- Figure S1.** ESI-MS spectrum of **1**.
- Figure S2.** <sup>1</sup>H-NMR spectrum of **1**.
- Figure S3.** <sup>13</sup>C-NMR spectrum of **1**.
- Figure S4.** ESI-MS spectrum of **2**.
- Figure S5.** <sup>1</sup>H-NMR spectrum of **2**.
- Figure S6.** <sup>13</sup>C-NMR spectrum of **2**.
- Figure S7.** ESI-MS spectrum of **3**.
- Figure S8.** <sup>1</sup>H-NMR spectrum of **3** (in CDCl<sub>3</sub>).
- Figure S9.** <sup>13</sup>C-NMR spectrum of **3**.
- Figure S10.** <sup>1</sup>H-NMR spectrum of **3** (in D<sub>2</sub>O).
- Figure S11.** ESI-MS spectrum of **4**.
- Figure S12.** 300 MHz <sup>1</sup>H-NMR spectrum of **4**.
- Table S1** Absorption peak position ( $\lambda$ , nm) and corresponding molar extinction coefficient ( $\epsilon$ , dm<sup>3</sup> mol<sup>-1</sup> cm<sup>-1</sup>) of **1-3** in different solvents
- Table S2** Emission maxima and fluorescence quantum yield ( $\phi_F$ ) of **1-3** in various solvents.
- Figure S13.** (a) Absorption & (b) normalized emission spectra of **1** in various solvents.
- Figure S14.** (a) Absorption & (b) normalized emission spectra of **2** in various solvents.
- Figure S15.** Absorption spectra of **3** in various solvents
- Figure S16.** Absorption spectra of **3** in presence of H<sub>2</sub>O in (a) THF, (b) DMF and (c) Acetone.

- Figure S17.** Emission spectra of **3** in presence of H<sub>2</sub>O in (a) THF, (b) DMF and (c) Acetone.
- Figure S18.** Emission spectra of **3** + H<sub>2</sub>O (1% v/v) in MeCN at different concentrations.
- Figure S19.** Photographs of **3** alone and in presence of H<sub>2</sub>O in different proportions in (a) Acetone, (b) DMF and (c) DMSO.
- Figure S20.** Absorption spectra of (a) **1** and (b) **2** in presence of H<sub>2</sub>O in MeCN.
- Figure S21.** Absorption spectra of **4** in presence of H<sub>2</sub>O in MeCN.
- Figure S22.** Absorption spectra of **3** as a function of added H<sub>2</sub>O in MeCN.
- Figure S23.** Photograph of **3** as a function of added H<sub>2</sub>O (% v/v) in MeCN.
- Figure S24.** Fluorescence spectra of **3** (MeCN, 1×10<sup>-8</sup>M) as a function of added H<sub>2</sub>O [mol/L].
- Figure S25.** Absorption spectra of **3** as a function of added MeOH in MeCN.
- Table S3** Selected geometrical parameters for the systems (**1-3**).
- Figure S26.** Electron density map of HOMO and LUMO of the geometrically optimized compounds (**1-3**).
- Figure S27.** Emission spectra of (a) **1** and (b) **2** in presence of H<sub>2</sub>O in MeCN.
- Figure S28.** Absorption spectra of **3** in presence of (a) Ethanol and (b) MeOH in MeCN.
- Figure S29.** Photographs of **3** alone (a) and in presence of MeOH and EtOH in different proportions in MeCN.
- Figure S30.** Photographs of **3** alone (a) and in presence of MeOH and EtOH in different proportions in THF.
- Figure S31.** Photograph of corresponding colors of **3** in different pH.
- Figure S32.** (a) Absorption and (b) emission spectra of **3** alone and in presence of H<sup>+</sup>.
- Figure S33.** Photographs of **3** alone and in presence of H<sup>+</sup> in different solvents.

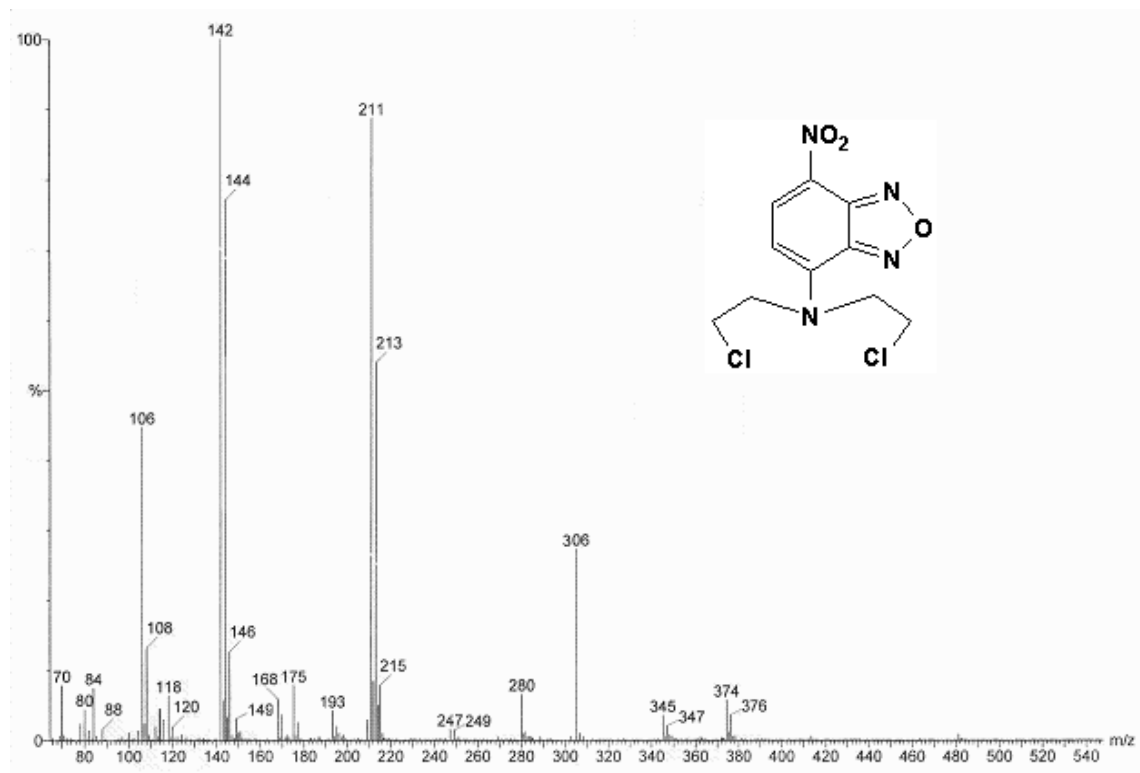

**Figure S1.** ESI-MS spectrum of 1 [ $306 = M+1 (m/z)^+$ ]

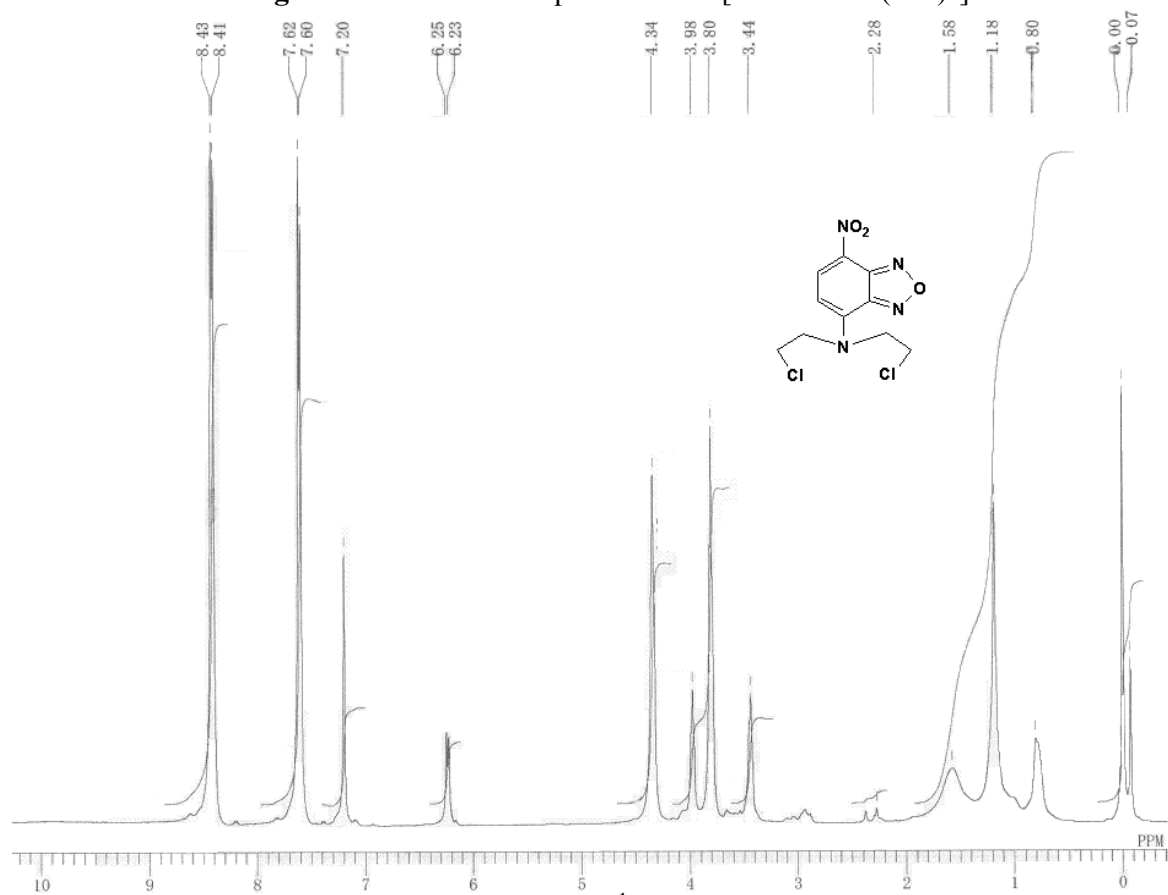

**Figure S2.** 400 MHz  $^1\text{H-NMR}$  spectrum of 1

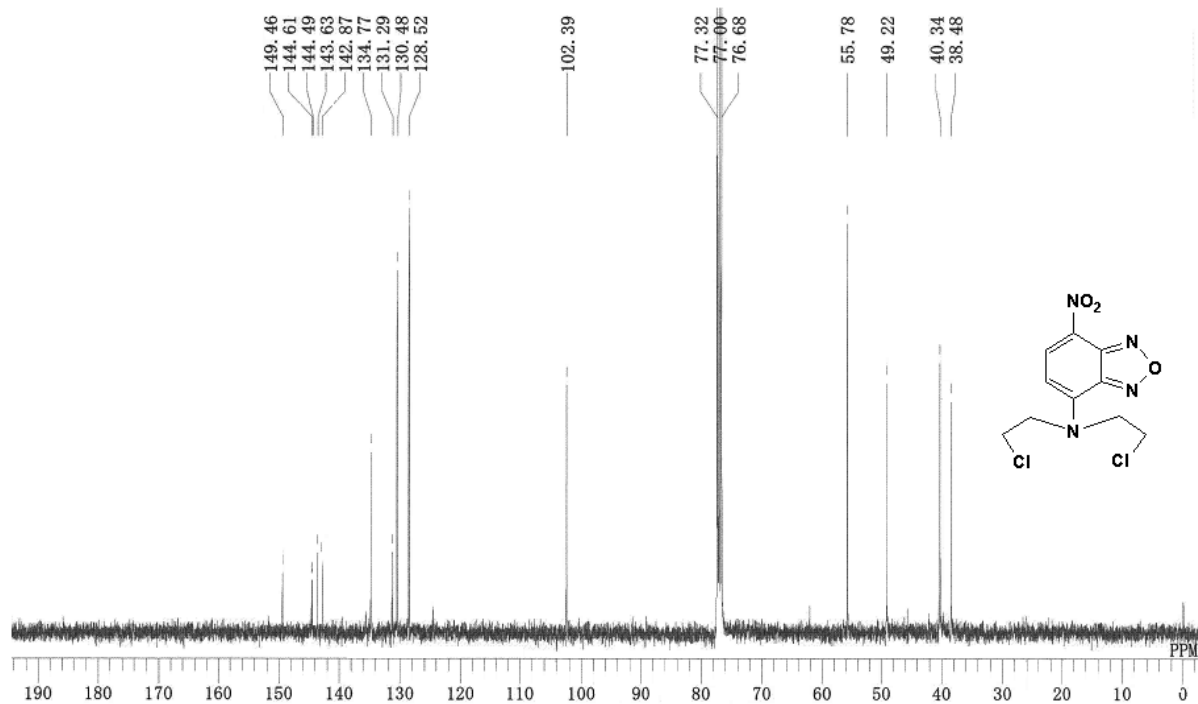

Figure S3 100 MHz  $^{13}\text{C}$ -NMR spectrum of **1**

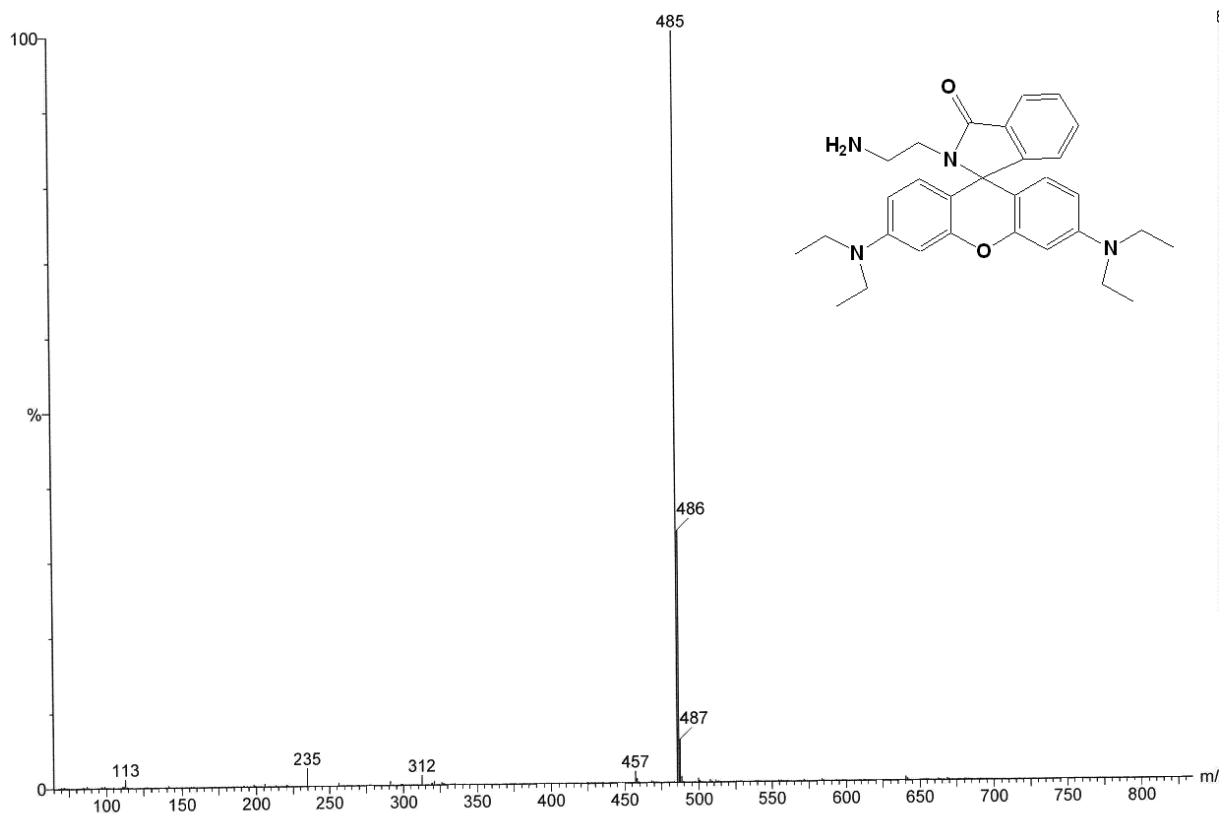

Figure S4: ESI-MS spectrum of **2** [485 =  $M+1$  ( $m/z$ )<sup>+</sup>]

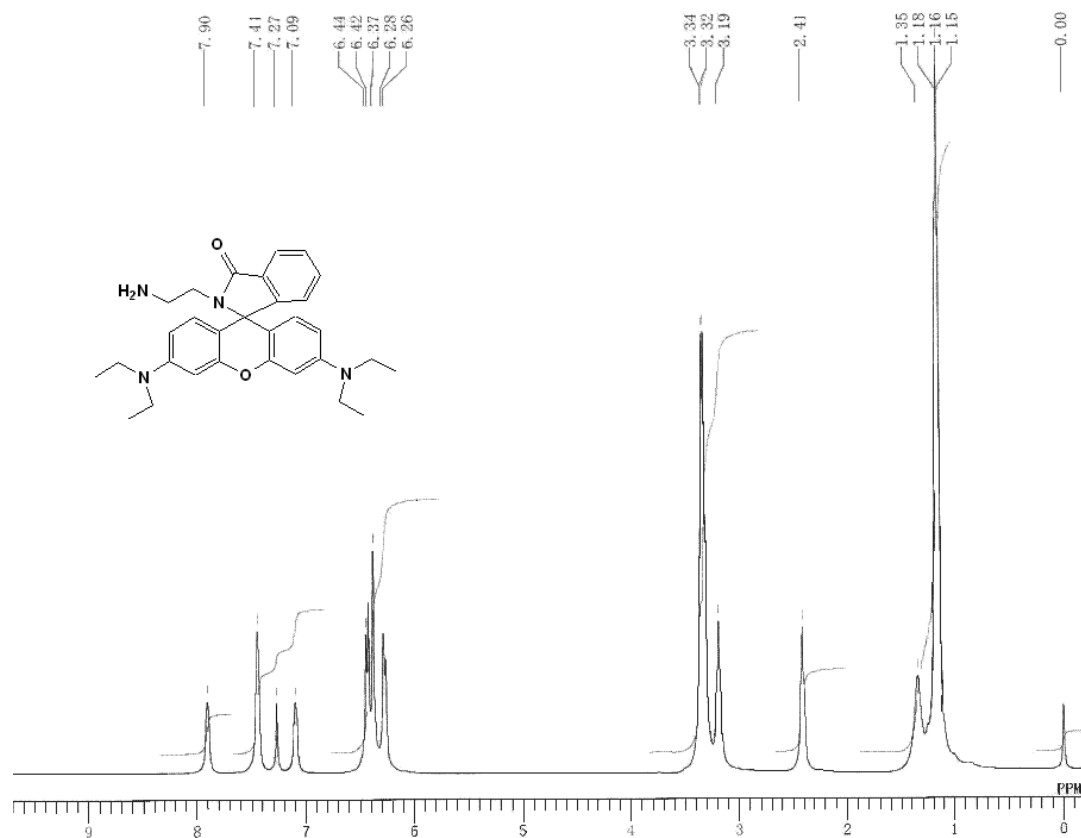

Figure S5. 400 MHz  $^1\text{H}$ -NMR spectrum of 2

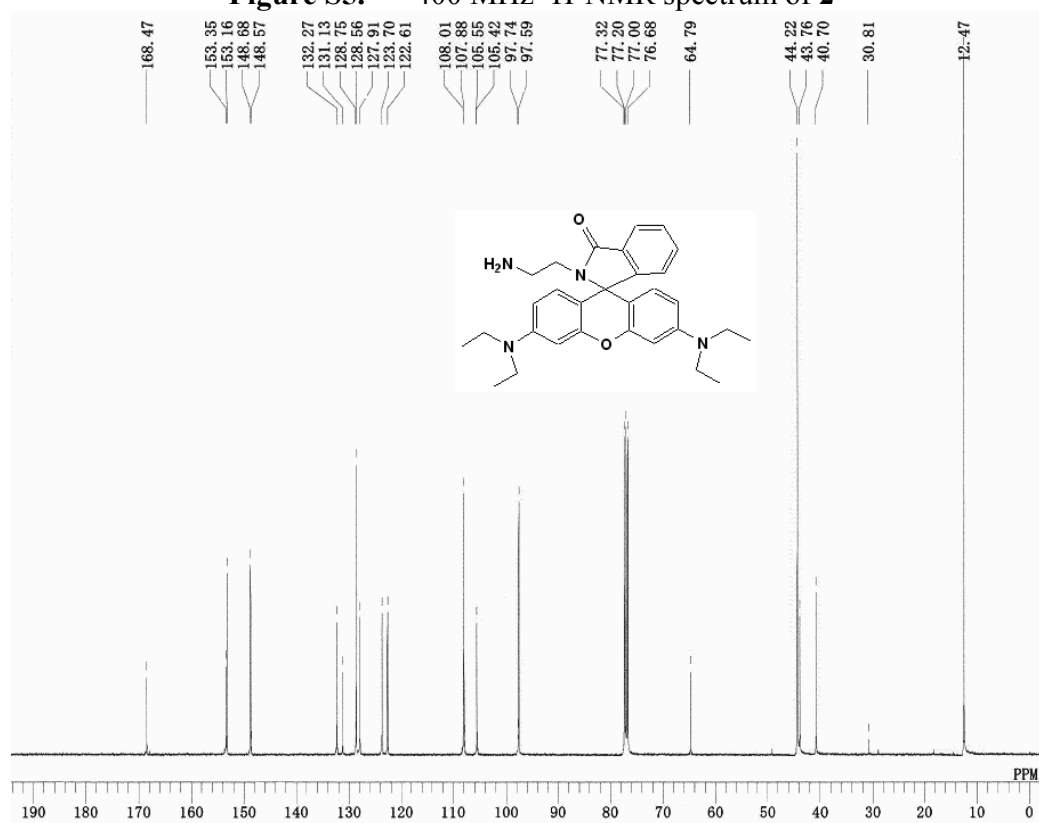

Figure S6. 100 MHz  $^{13}\text{C}$ -NMR spectrum of 2

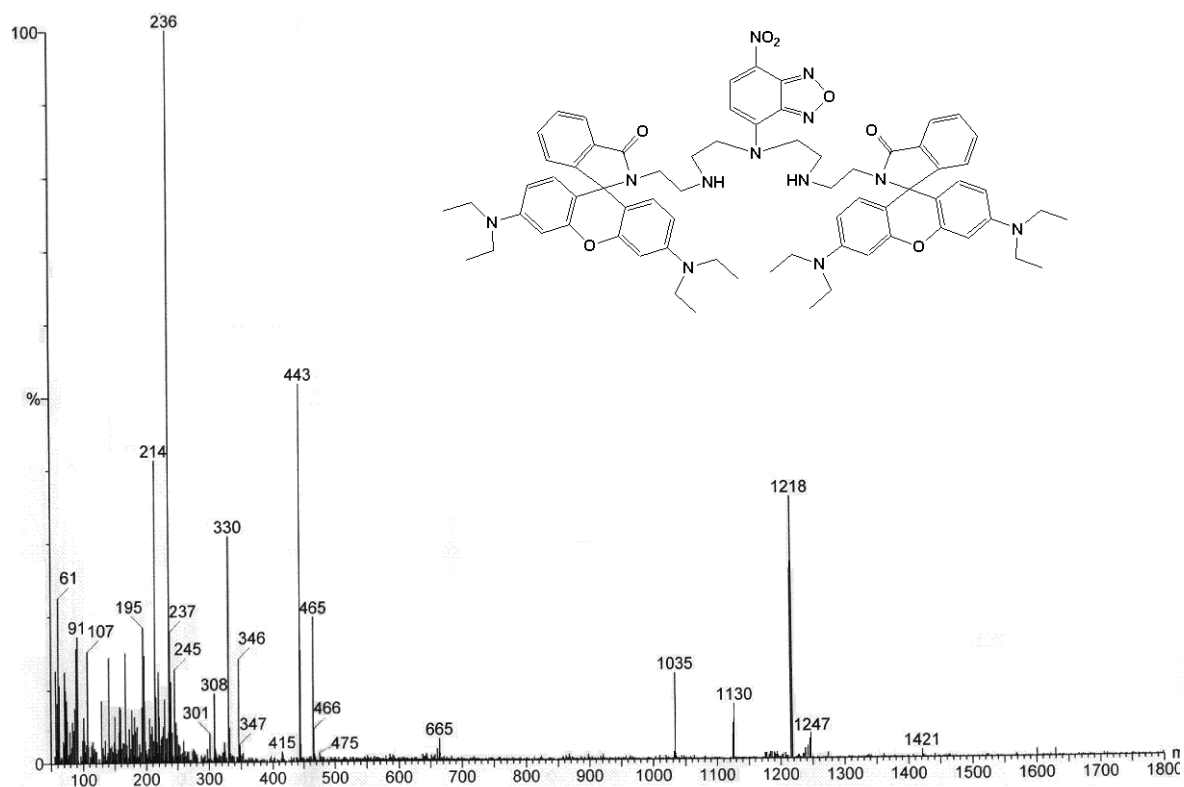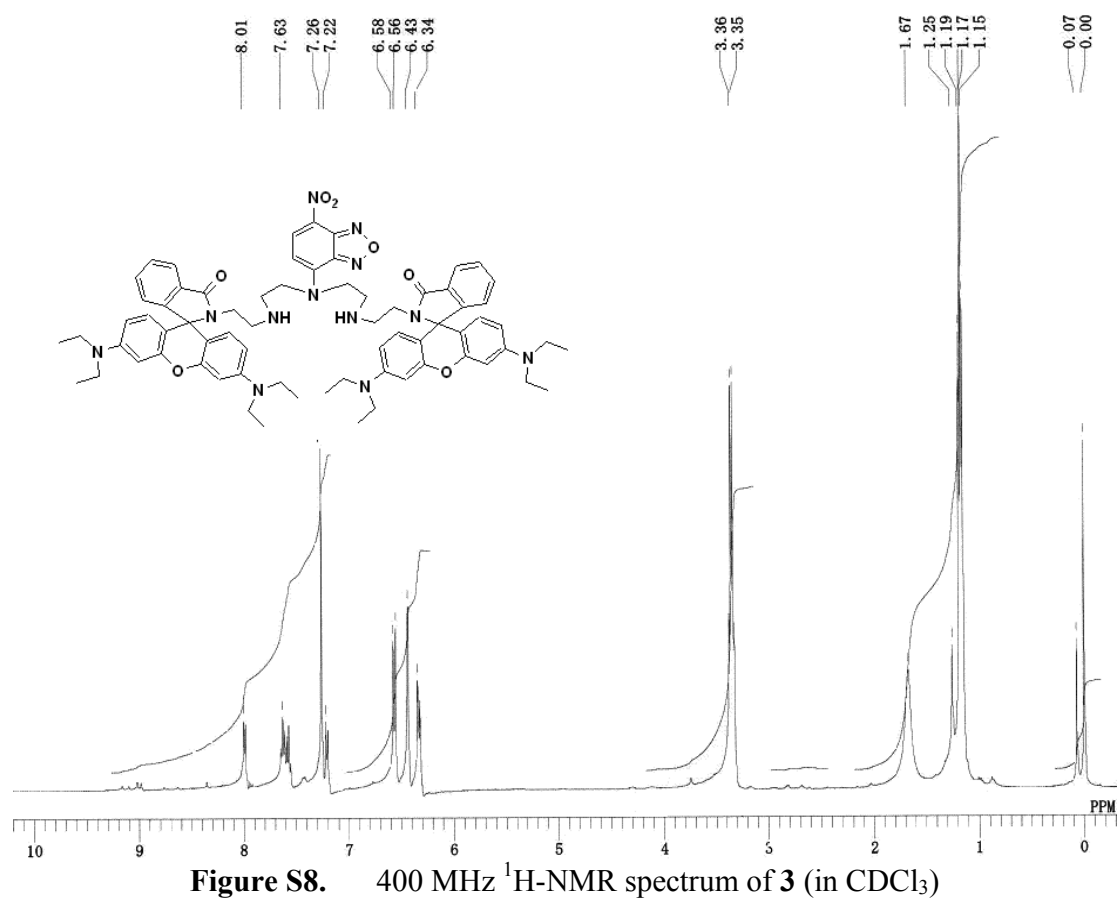

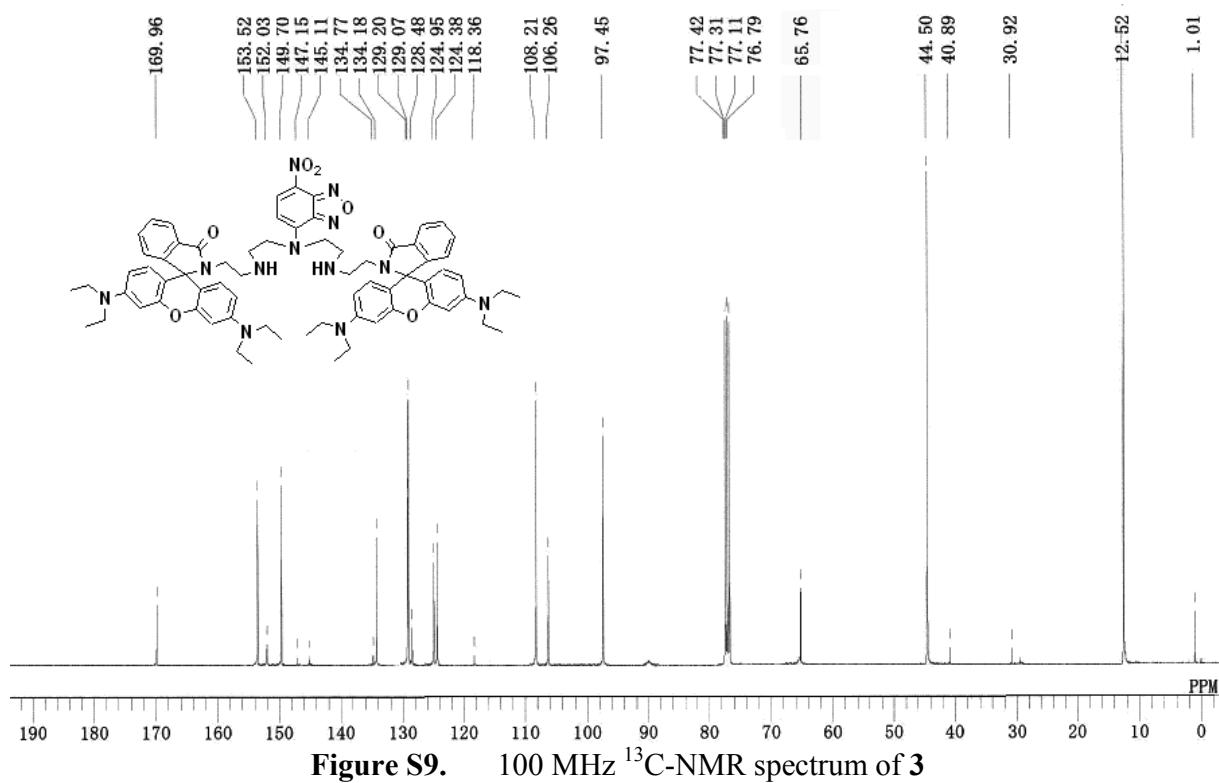

Figure S9. 100 MHz  $^{13}\text{C}$ -NMR spectrum of **3**

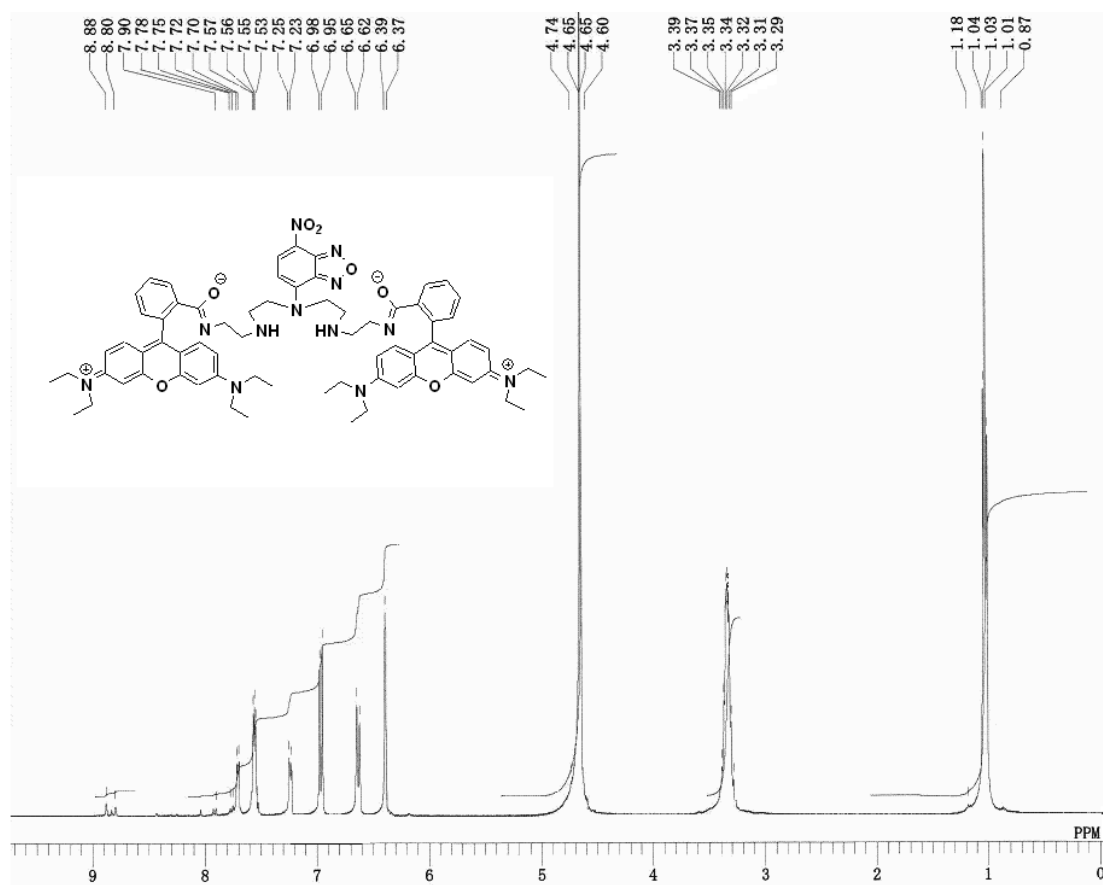

Figure S10. 400 MHz  $^1\text{H}$ -NMR spectrum of **3** (in  $\text{D}_2\text{O}$ )

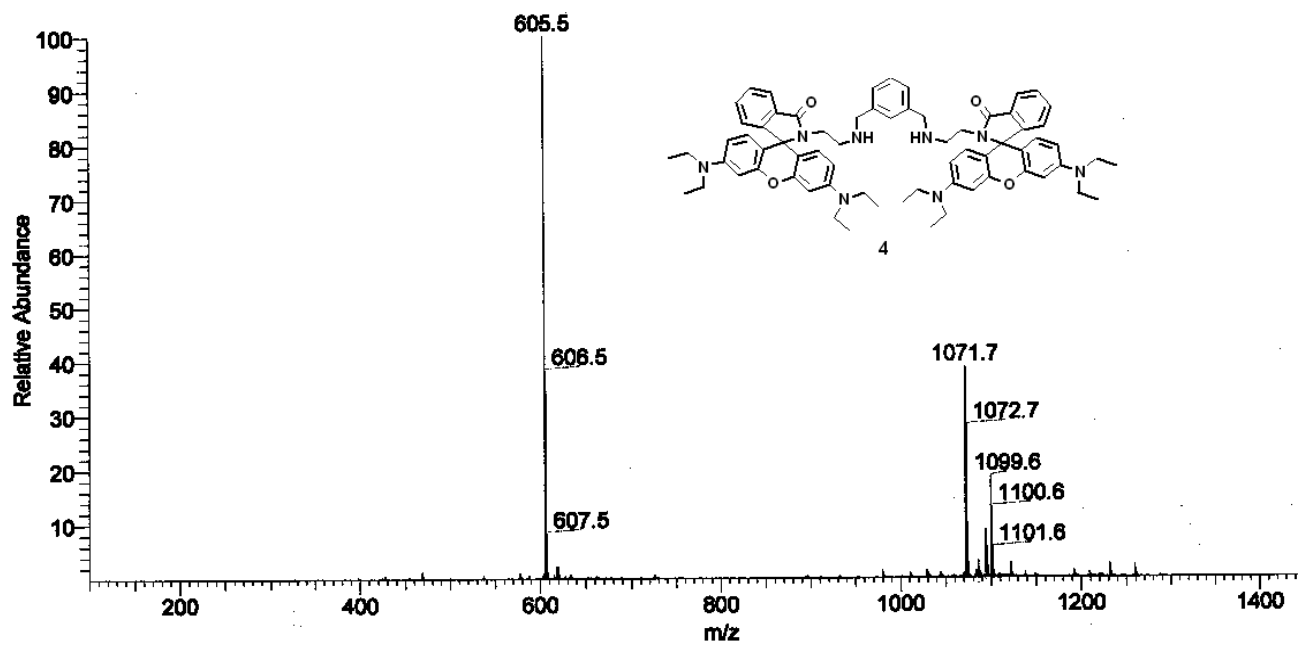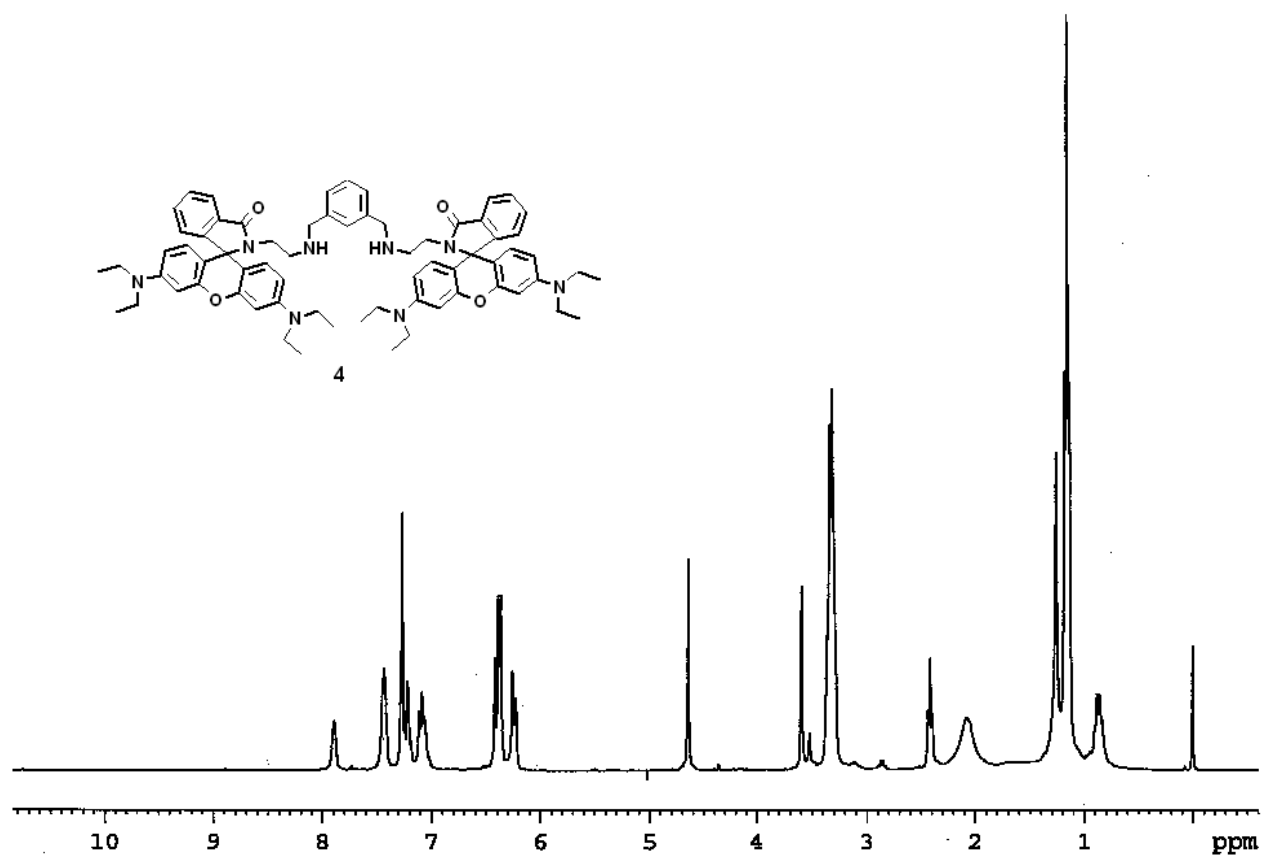



**Table S1** Absorption peak position ( $\lambda$ , nm) and corresponding molar extinction coefficient ( $\epsilon$ ,  $\text{dm}^3\text{mol}^{-1}\text{cm}^{-1}$ ) of **1-3** in different solvents (conc.  $1 \times 10^{-6}$  M)

| Ligand            | Solvent           | $\lambda$ , nm ( $\epsilon$ , $\text{dm}^3\text{mol}^{-1}\text{cm}^{-1}$ )        |                                                    |               |
|-------------------|-------------------|-----------------------------------------------------------------------------------|----------------------------------------------------|---------------|
| <b>1</b>          | n-Hexane          | 434 (s, n. d.)                                                                    | 331 (n. d.)                                        | 268 (n. d.)   |
|                   | CHCl <sub>3</sub> | 456 (31732),                                                                      | 333 (36521),                                       | 265 (14167)   |
|                   | Ethyl Acetate     | 457 (10641),                                                                      | 320 (11367),                                       | 269 (15039)   |
|                   | THF               | 461 (4135),                                                                       | 322 (3838),                                        |               |
|                   | DCM               | 458 (24577),                                                                      | 337 (36673),                                       | 264 (16778)   |
|                   | DMSO              | 475 (14907),                                                                      | 336 (18019),                                       | 259 (7470)    |
|                   | DMF               | 473 (14472),                                                                      | 347 (6702),                                        | 271 (9340)    |
|                   | Acetone           | 464 (15312)                                                                       | -                                                  |               |
|                   | Ethanol           | 463 (5273),                                                                       | 333 (5845),                                        | 264 (2708)    |
|                   | Acetonitrile      | 468(5848),                                                                        | 337 (4588),                                        | 276 (3060, s) |
|                   | Methanol          | 464 (12249),                                                                      | 334 (15281)                                        | 265 (8915, s) |
|                   | <b>2</b>          | n-Hexane                                                                          | 500 (n. d.),                                       | 308 (n. d.),  |
| CHCl <sub>3</sub> |                   | 495 (23),                                                                         | 316 (78015),                                       | 274 (197360)  |
| Ethyl Acetate     |                   | 495 (23),                                                                         | 311 (57947),                                       | 272 (183184)  |
| THF               |                   | 504 (16),                                                                         | 312 (28858),                                       | 273 (65393)   |
| DCM               |                   | 500 (25),                                                                         | 316 (49733),                                       | 275 (143000)  |
| DMSO              |                   | 499 (20),                                                                         | 315 (45545),                                       | 271 (111957)  |
| DMF               |                   | 498 (17),                                                                         | 315 (45520),                                       | 272 (111538)  |
| Acetone           |                   | 502 (20)                                                                          |                                                    |               |
| Ethanol           |                   | 504 (28),                                                                         | 312 (30957),                                       | 272 (85231)   |
| Acetonitrile      |                   | 496 (20),                                                                         | 314 (35172),                                       | 273 (95524)   |
| Methanol          |                   | 508 (42),                                                                         | 313 (63587),                                       | 274 (172849)  |
| <b>3</b>          |                   | n-Hexane                                                                          | 557 (n. d.), 415 (n. d.), 307 (n. d.), 271 (n. d.) |               |
|                   | 1,4-Dioxane       | 561 (1435), 383 (5575)                                                            |                                                    |               |
|                   | CHCl <sub>3</sub> | 554 (23626), 315 (94685), 276 (161603)                                            |                                                    |               |
|                   | Ethyl Acetate     | 556 (643), 312 (40503), 273 (86213)                                               |                                                    |               |
|                   | THF               | 556 (992), 395 (2660), 312 (99790), 274 (178759)                                  |                                                    |               |
|                   | DCM               | 558 (22796), 315 (104597), 278 (177569)                                           |                                                    |               |
|                   | DMSO              | 560 (992), 401 (2043), 315 (49149), 275 (92875)                                   |                                                    |               |
|                   | DMF               | 560 (938), 402 (2231), 316 (49090), 275 (93924)                                   |                                                    |               |
|                   | Acetone           | 559 (5755), 395 (9227)                                                            |                                                    |               |
|                   | Ethanol           | 542 (325269), 502 (92716), 393 (18154), 355 (33712),<br>304 (56017), 257 (112086) |                                                    |               |
|                   | Acetonitrile      | 552 (1795), 317 (87867), 275 (165880)                                             |                                                    |               |
|                   | Methanol          | 544 (345787), 400 (17086), 353 (39993), 305 (62634),<br>279 (69569)               |                                                    |               |

**Table S2** Emission maxima and fluorescence quantum yield ( $\phi_F$ ) of **1-3** in different solvents<sup>a</sup>.

| Ligand            | Solvents          | $\lambda_{\text{max}}^{\text{em}}$ (nm) | Quantum Yield ( $\phi_F$ ) |
|-------------------|-------------------|-----------------------------------------|----------------------------|
| <b>1</b>          | n-Hexane          | 494                                     | n. d.                      |
|                   | CHCl <sub>3</sub> | 514                                     | 0.041                      |
|                   | Ethyl Acetate     | 519                                     | 0.007                      |
|                   | THF               | 526                                     | 0.001                      |
|                   | DCM               | 525                                     | 0.037                      |
|                   | DMSO              | 530                                     | 0.001                      |
|                   | DMF               | 532                                     | 0.001                      |
|                   | Acetone           | 530                                     | 0.001                      |
|                   | Ethanol           | 527                                     | 0.002                      |
|                   | Acetonitrile      | 530                                     | 0.001                      |
|                   | Methanol          | 532                                     | 0.002                      |
|                   | <b>2</b>          | n-Hexane                                | 517                        |
| CHCl <sub>3</sub> |                   | 536                                     | 0.009                      |
| Ethyl Acetate     |                   | 530                                     | 0.019                      |
| THF               |                   | 536                                     | 0.017                      |
| DCM               |                   | 534                                     | 0.025                      |
| DMSO              |                   | 536                                     | 0.004                      |
| DMF               |                   | 534                                     | 0.003                      |
| Acetone           |                   | 534                                     | 0.002                      |
| Ethanol           |                   | 539                                     | 0.013                      |
| Acetonitrile      |                   | 530                                     | 0.007                      |
| Methanol          |                   | 538                                     | 0.009                      |
| <b>3</b>          |                   | n-Hexane                                | 562                        |
|                   | CHCl <sub>3</sub> | 564                                     | 0.249                      |
|                   | Ethyl Acetate     | 567                                     | 0.035                      |
|                   | THF               | 568                                     | 0.009                      |
|                   | DCM               | 566                                     | 0.355                      |
|                   | DMSO              | 588                                     | 0.002                      |
|                   | DMF               | 587                                     | 0.002                      |
|                   | Acetone           | 579                                     | 0.013                      |
|                   | Ethanol           | 630                                     | 0.291                      |
|                   | Acetonitrile      | 575                                     | 0.005                      |
|                   | Methanol          | 629                                     | 0.256                      |

<sup>a</sup>Experimental Conditions: Concentration of free ligands:  $1 \times 10^{-6}$  M;  $\lambda_{\text{ex}} = \lambda_{\text{abs}}$ (400-600 nm, varies with solvent); excitation and emission band-pass: 5 nm; T= 298 K;  $\phi_F$  was calculated by comparison of corrected spectrum with that of Rhodamine G ( $\phi_F = 0.95$ ) in EtOH taking the area under the total emission. The error in  $\phi_F$  is within 15 %.

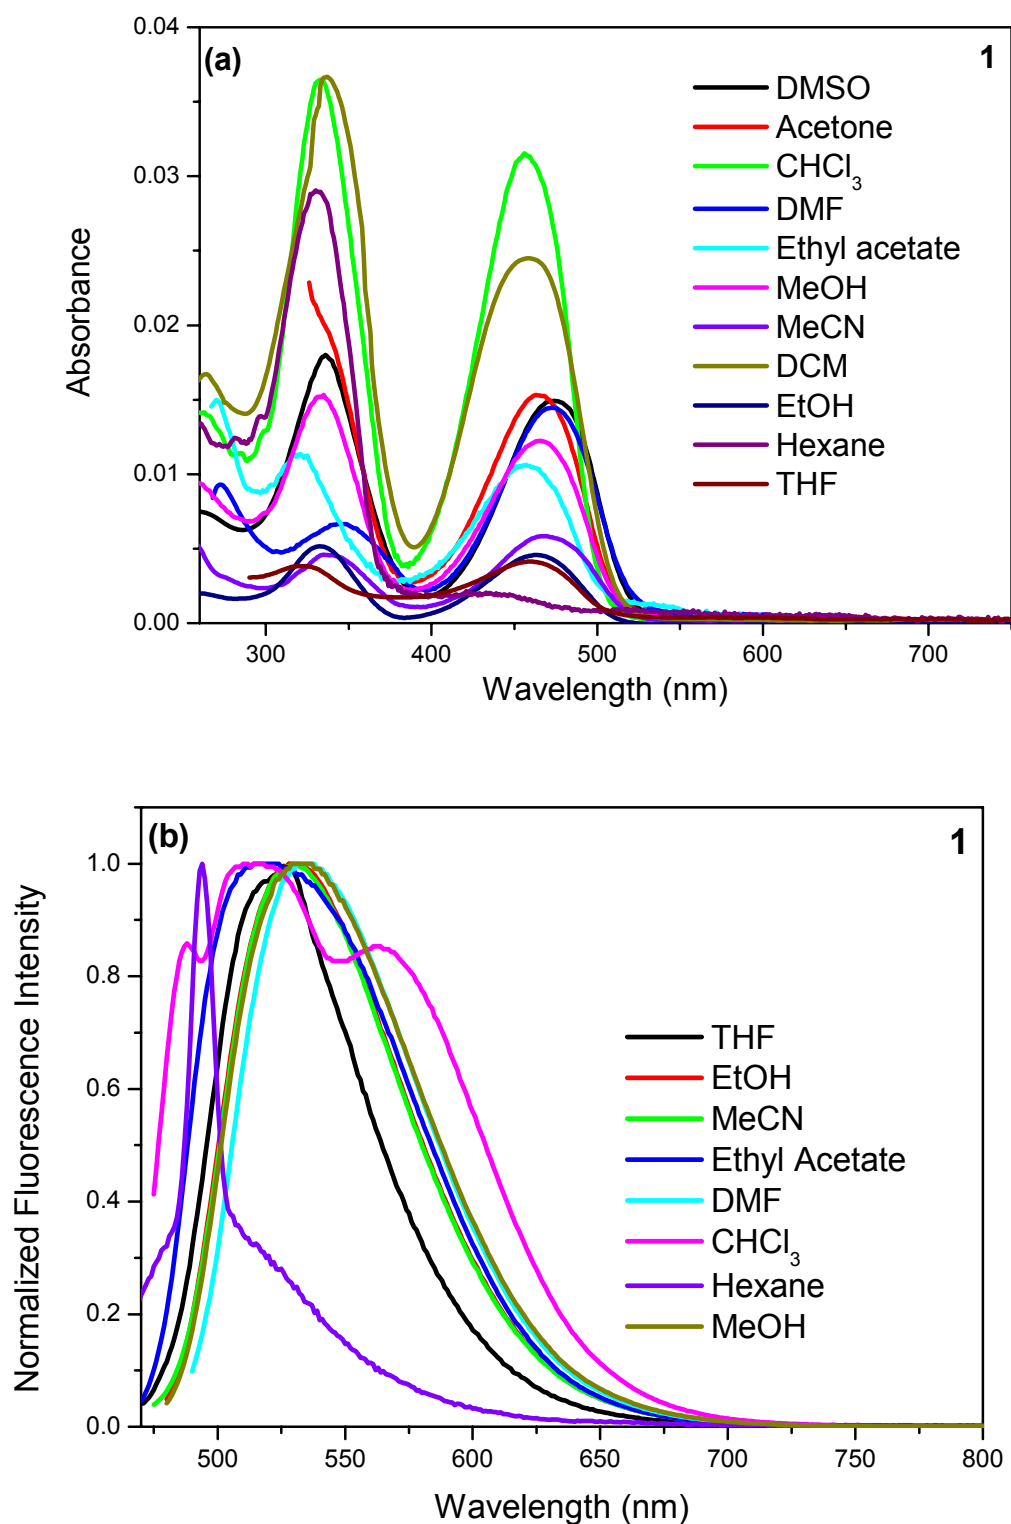

**Figure S13.** Absorption (a) & normalized emission (b) spectra of **1** in various solvents. Absorption: concentration =  $1 \times 10^{-6}$  M; Emission experimental conditions:  $1 \times 10^{-6}$  M;  $\lambda_{\text{ex}} = \lambda_{\text{abs}}$  (400-600 nm, varies with solvent), emission and excitation band pass: 5 nm, Temperature: 298 K.

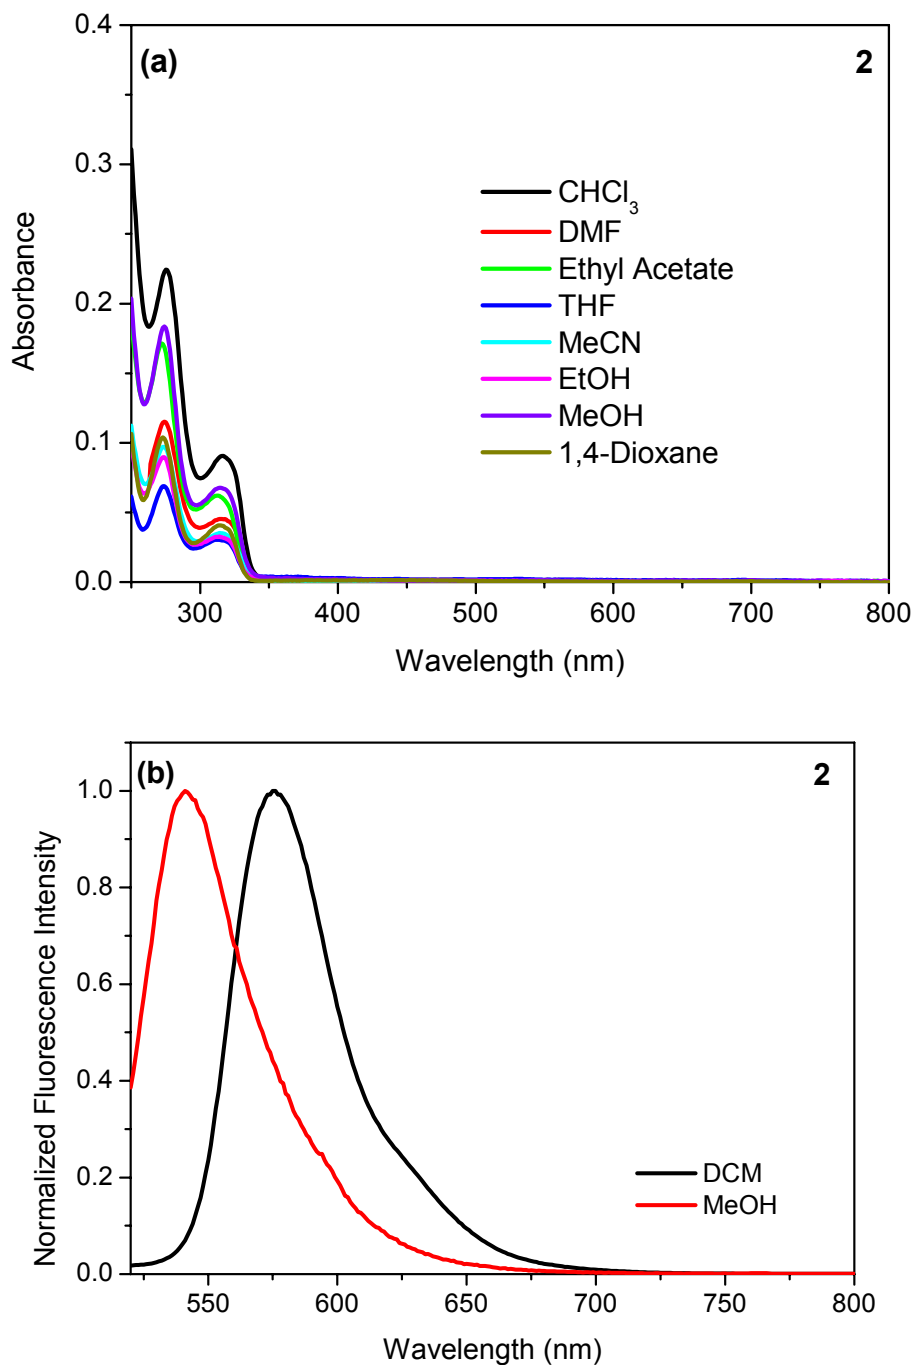

**Figure S14** Absorption (a) and Normalized fluorescence (b) spectra of **2** in various solvents. [Conc. =  $1 \times 10^{-6}$  M]. From the emission spectra, it is apparent that the ground state is more stabilized in polar solvents than in non-polar solvents causing blue-shift of emission.

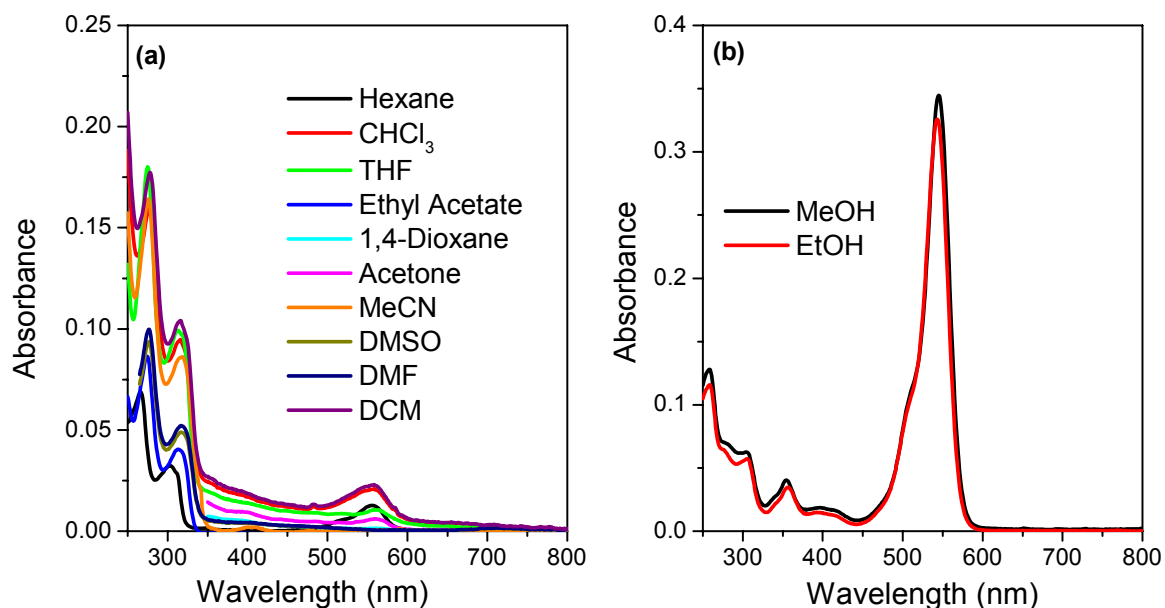

**Figure S15.** Absorption spectra of **3** in various solvents (conc.  $1 \times 10^{-6}$  M).

From the figure, it is apparent that the solution of **3** in the solvents in (b) exhibits pink colour with a higher molar extinction coefficient ( $\epsilon$ ) of absorption at  $\sim 550$  nm whereas the colorless solution in solvents in (a) do not absorb or fairly absorb in that region. The little absorption with a lower molar extinction coefficient in 500-600 nm region in the solvents in Fig S15-(a) may be due to trace of ring-opened molecules of **3** [Ref: Y. Xiang, and A. Tong, *Org. Lett.* 2006, **8**, 1549]. The absorption with a high molar extinction coefficient in 500-600 nm region in the solvents in Fig S15-(b) may be attributed to the solvent assisted ring opening of the *spiro*-form of rhodamine in **3**. The mechanism of solvent-assisted ring opening is yet to be properly understood, however, the function of solvent polarity may be excluded for deducing the mechanism as apparent from these spectroscopic data.

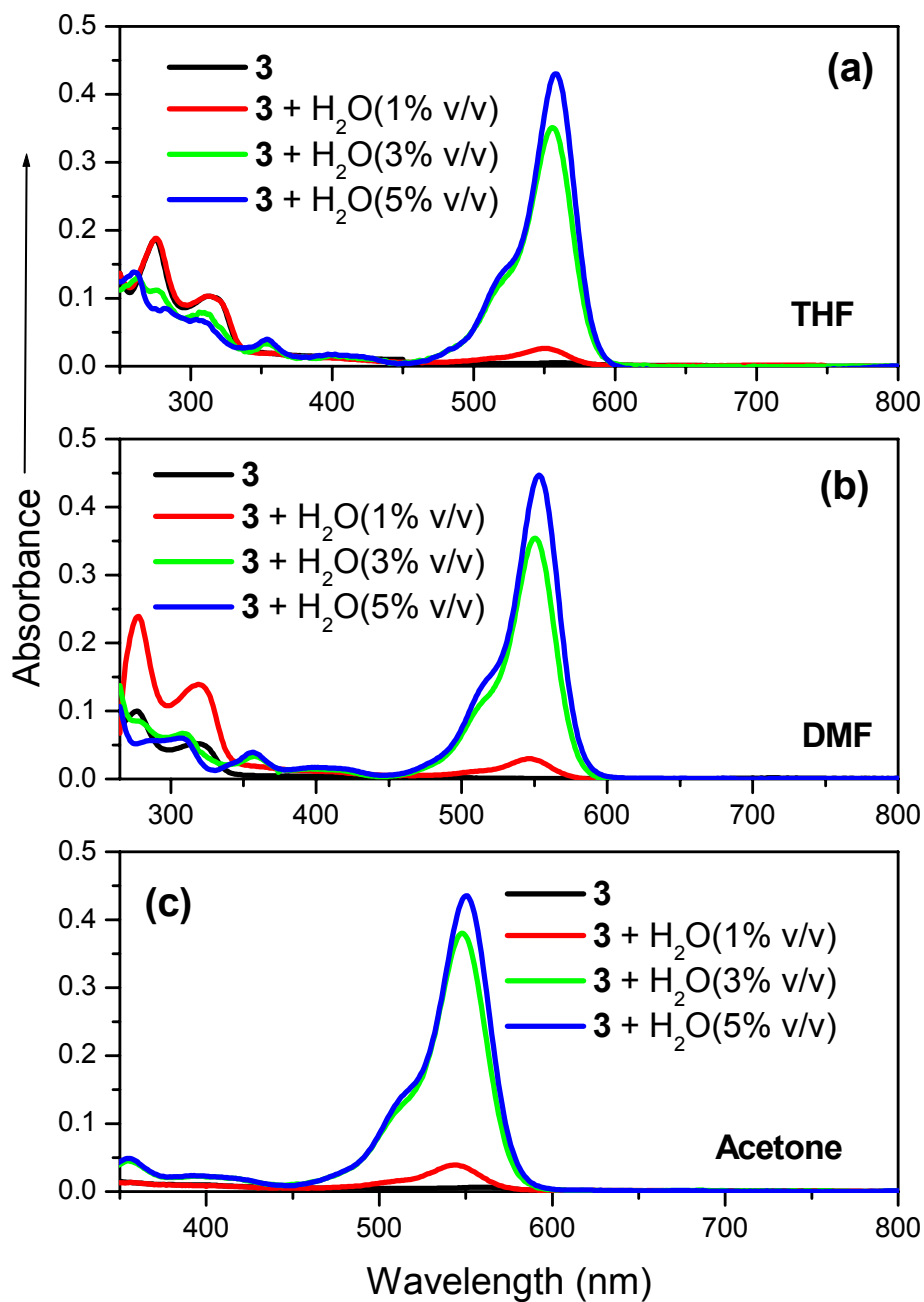

**Figure S16.** Absorption spectra of **3** in presence of H<sub>2</sub>O in (a) THF, (b) DMF and (c) Acetone. [conc. =  $1 \times 10^{-6}$  M].

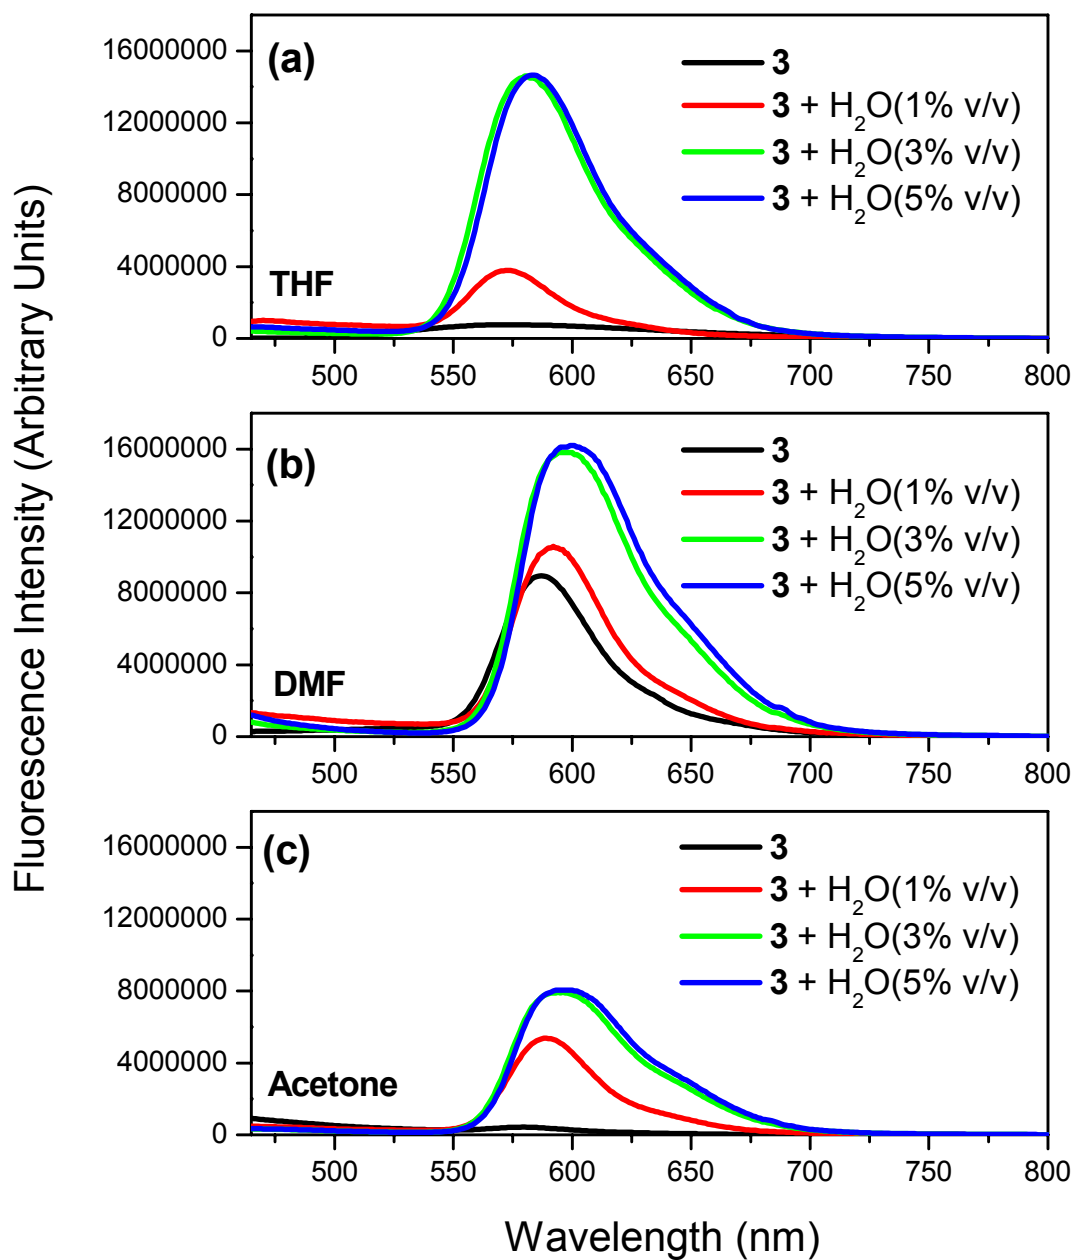

**Figure S17.** Emission spectra of **3** in presence of H<sub>2</sub>O in (a) THF, (b) DMF and (c) Acetone. Concentration of free ligand:  $1 \times 10^{-7}$  M,  $\lambda_{\text{ex}} = 450$  nm.

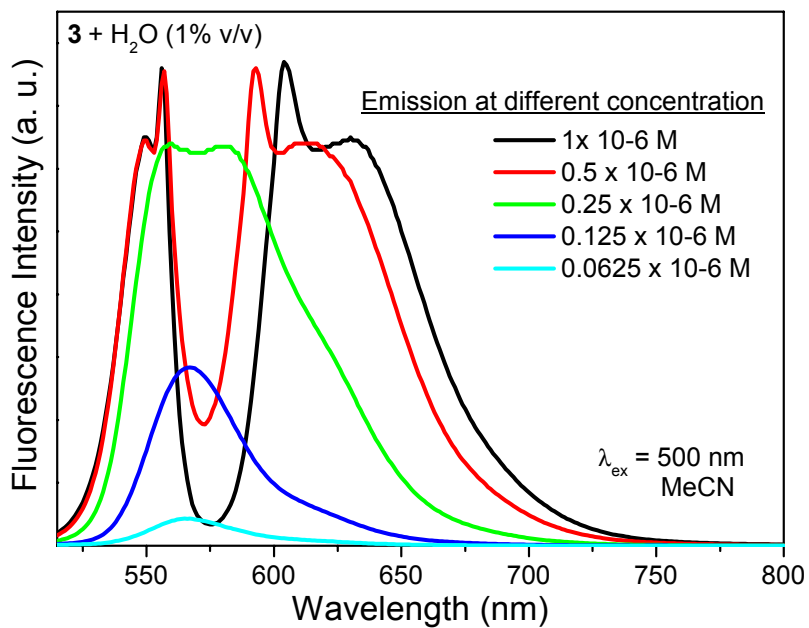

**Figure S18.** Emission spectra of **3** in presence of H<sub>2</sub>O (1% v/v) in MeCN at different concentration excited at 500nm indicating excimer formation at 620nm.

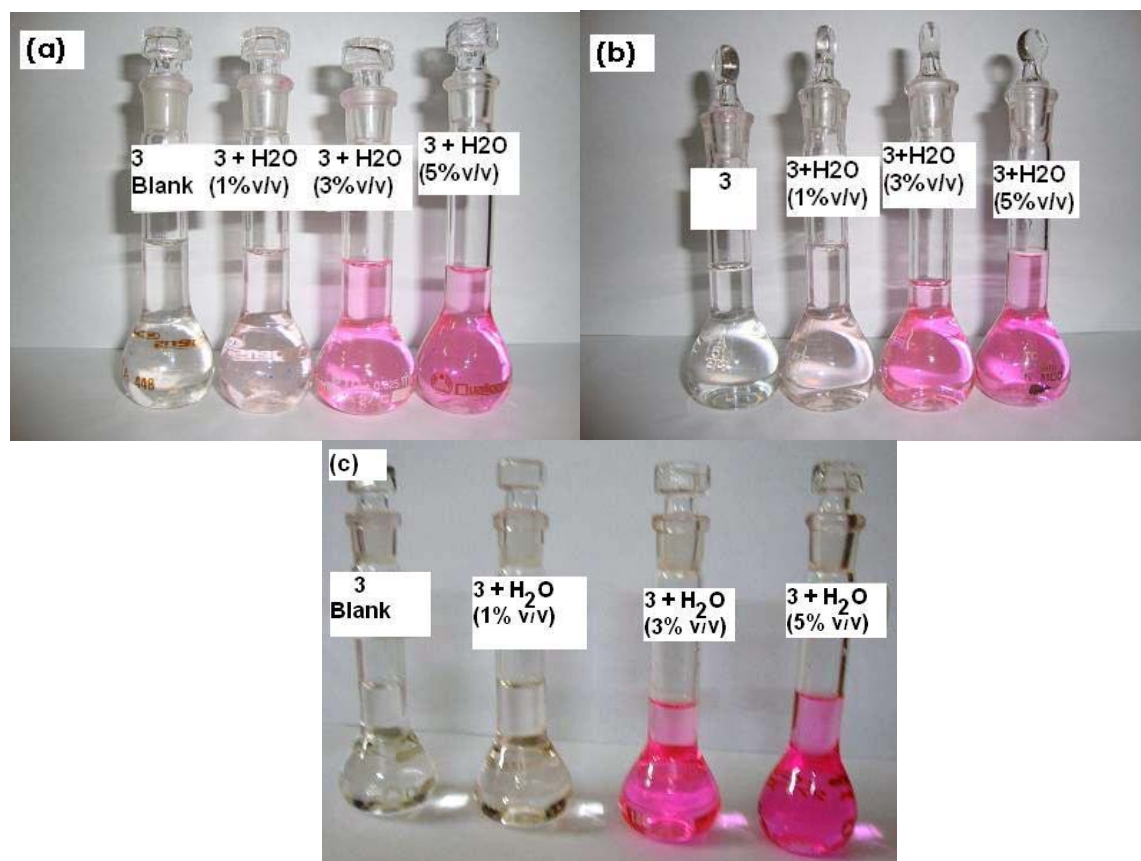

**Figure S19.** Photographs of **3** alone and in presence of H<sub>2</sub>O in different proportions in (a) Acetone, (b) DMF and (c) DMSO. [conc. 1 × 10<sup>-6</sup> M]



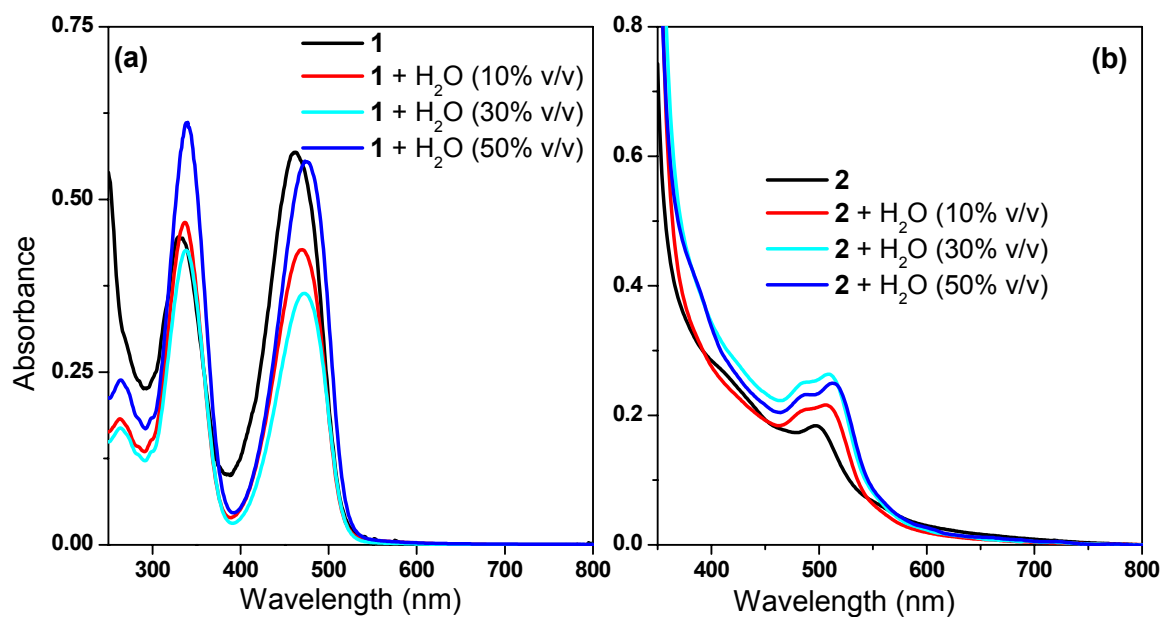

**Figure S20.** Absorption spectra of (a) **1** and (b) **2** in presence of H<sub>2</sub>O in MeCN. Conc. of **1** =  $1 \times 10^{-4}$ M; conc. of **2** =  $1 \times 10^{-2}$ M; added water in % of v/v with MeCN.

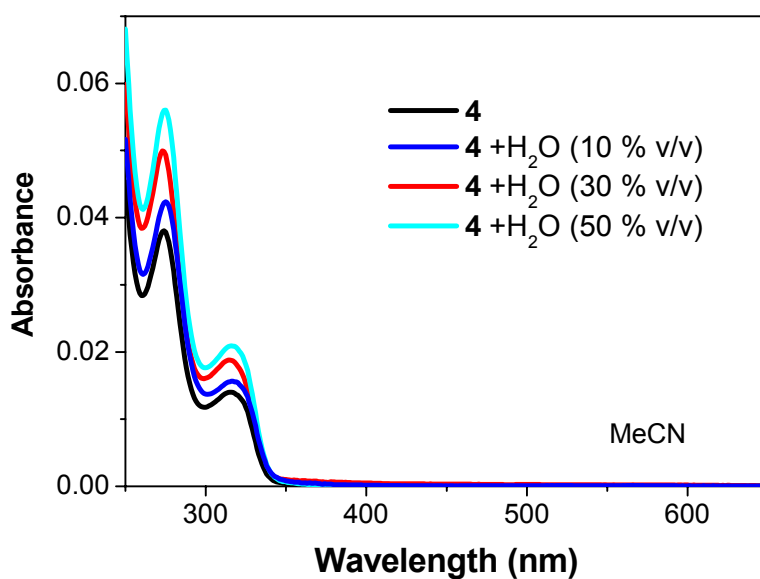

**Figure S21.** Absorption spectra of **4** in presence of H<sub>2</sub>O in MeCN [conc. of **4** =  $1 \times 10^{-6}$ M]

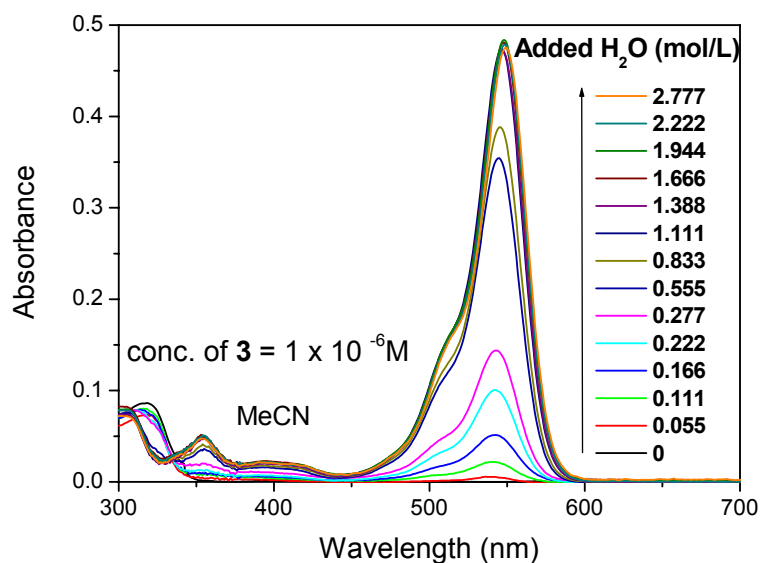

**Figure S22.** Absorption spectra of **3** as a function of added H<sub>2</sub>O [mol/L] in MeCN.

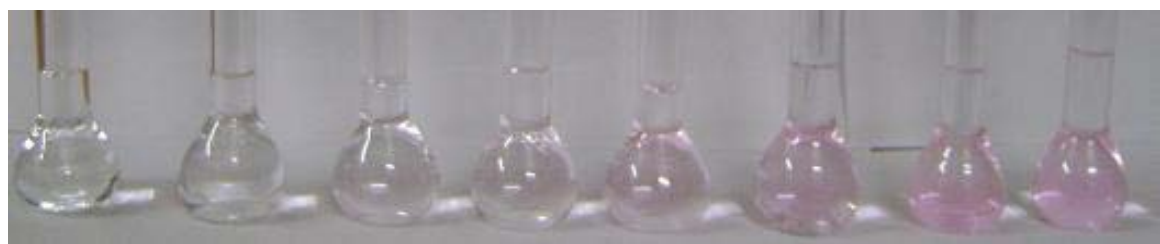

**Figure S23.** Photograph of **3** as a function of added H<sub>2</sub>O (% v/v) in MeCN (conc. 1×10<sup>-6</sup> M).

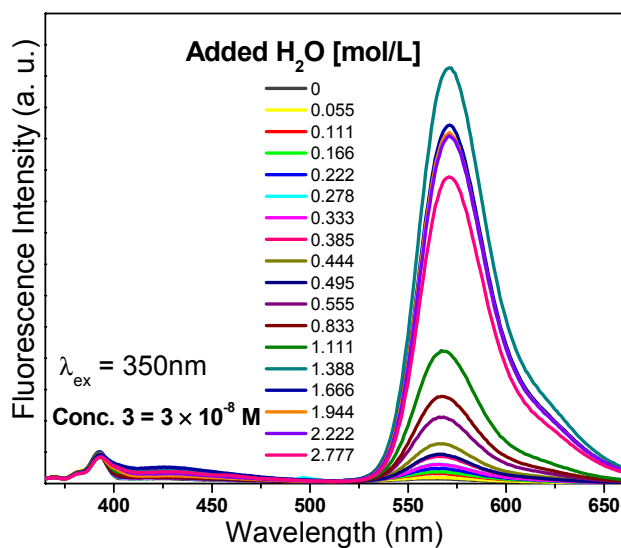

**Figure S24.** Fluorescence spectra of **3** (MeCN, 1×10<sup>-8</sup> M) as a function of added H<sub>2</sub>O [mol/L].

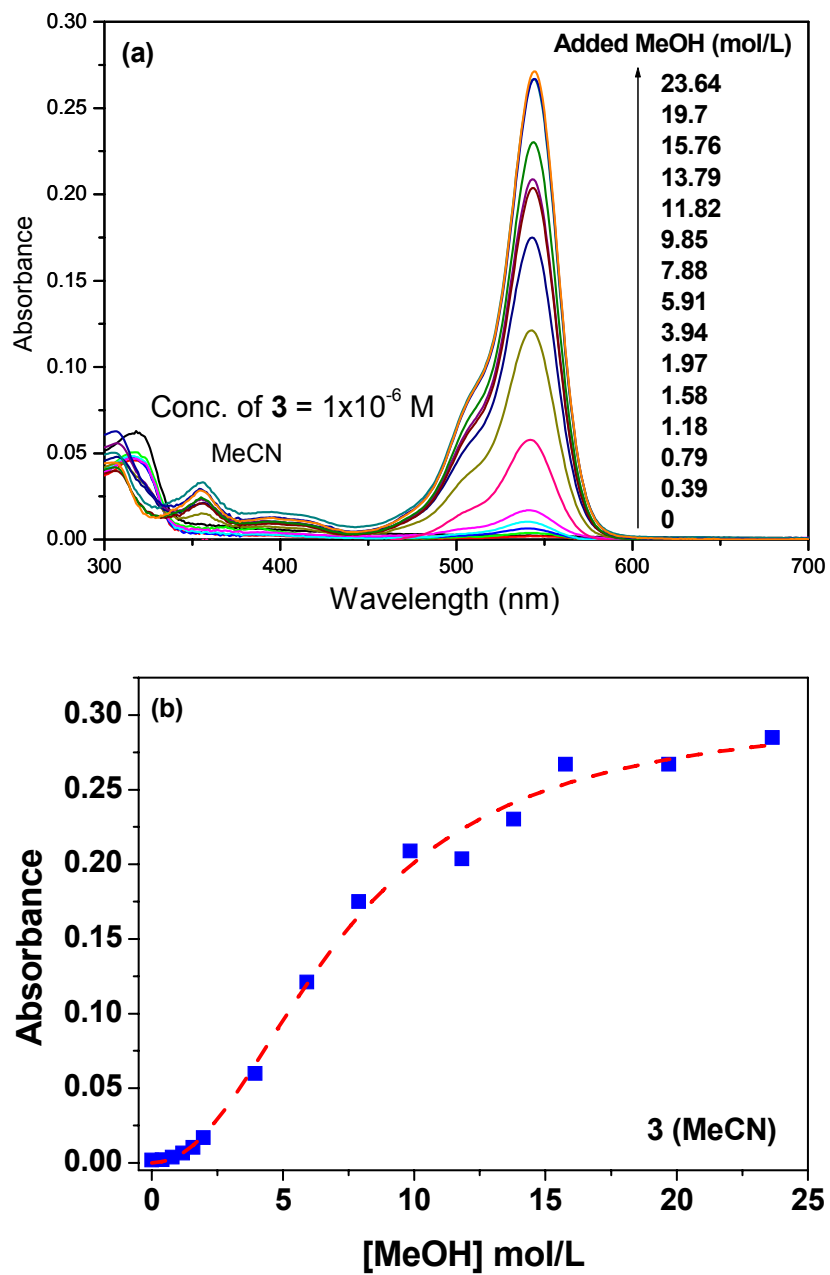

**Figure S25.** (a) absorption spectra and (b) plot of absorbance of **3** as a function of added MeOH [mol/L] in MeCN (conc.  $1 \times 10^{-6}$  M).

### Theoretical Calculations to evaluate primary PET process:

The structure of a fluorophoric system provides vital information towards the thermodynamics of the feasibility of the operative processes. A slight structural modification of the system can perturb its photophysical property significantly. In order to complement the structural aspect of the molecules, geometrical optimization for the fluorophoric system **1** and its fragments were carried out by employing the semi-empirical PM3 method (convergence gradient <0.001, Hyperchem version 7.0, Hypercube Inc).

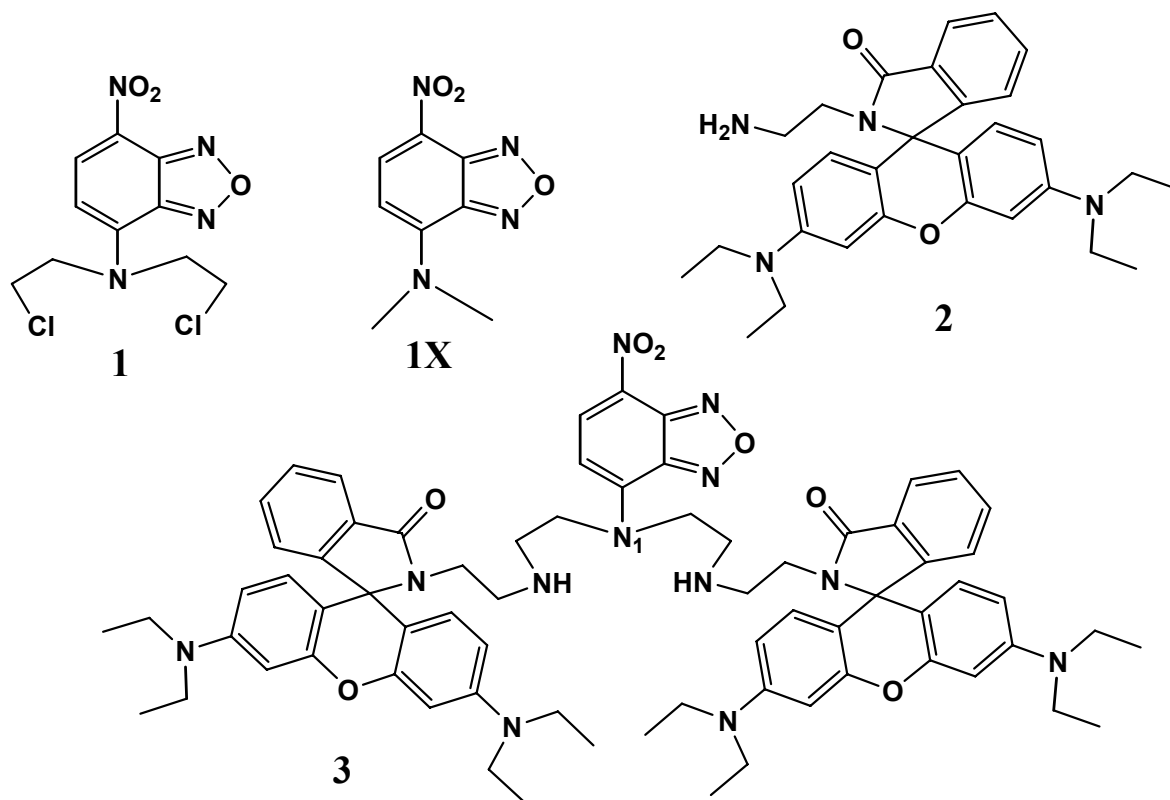

**Table S3.** Selected geometrical parameters<sup>a</sup> for the systems (**1-3**).

|           | $\mu_{\text{TOTAL}}$<br>(D) | $E_{\text{HOMO}}$<br>(eV) | $E_{\text{LUMO}}$<br>(eV) | $\Delta E_{\text{HOMO-LUMO}}$<br>(eV) | $R_{\text{D-A(NO}_2\text{)}}$<br>(Å) | $R_{\text{D-A(Rhod-O)}}$<br>(Å) |
|-----------|-----------------------------|---------------------------|---------------------------|---------------------------------------|--------------------------------------|---------------------------------|
| <b>1</b>  | 6.21                        | -9.403                    | -2.084                    | 7.319                                 | 5.836(3)                             | -                               |
| <b>1X</b> | 7.83                        | -9.170                    | -1.944                    | 7.226                                 | 5.832(1)                             | -                               |
| <b>2</b>  | 6.73                        | -8.490                    | -0.384                    | 8.116                                 | -                                    | 5.471(0)                        |
| <b>3</b>  | 5.10                        | -8.872                    | -1.488                    | 7.384                                 | 5.826(7)                             | 3.860(1)                        |

<sup>a</sup> R = distance between donor and acceptor

**Figure S26.** Electron density map of HOMO and LUMO of the geometrically optimized compounds (1-3)

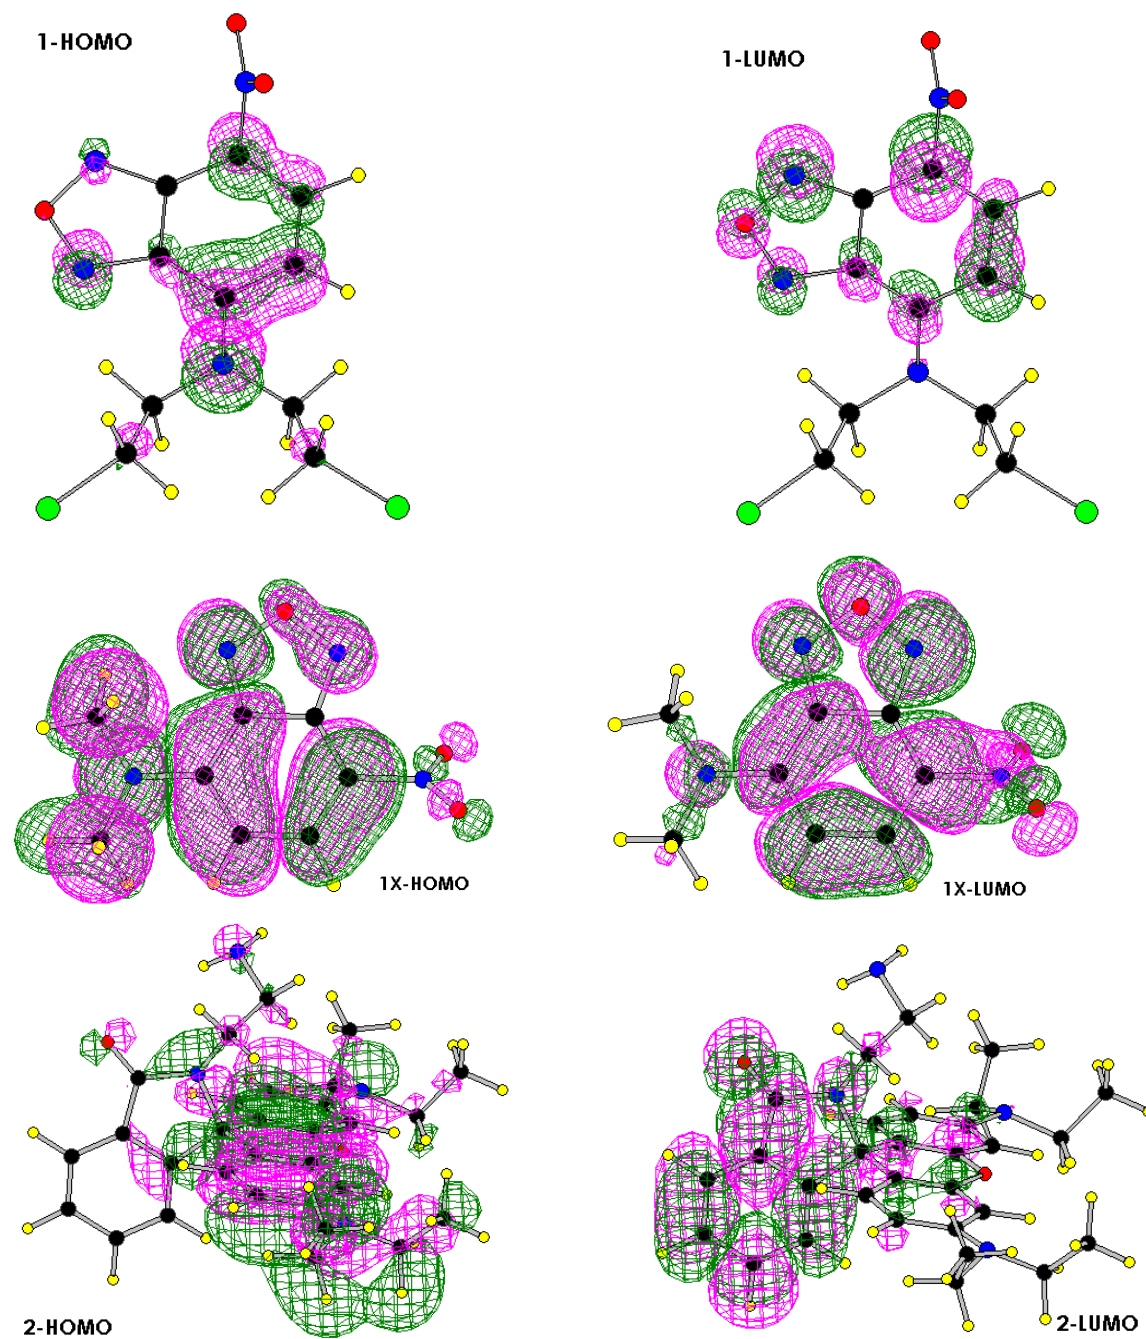

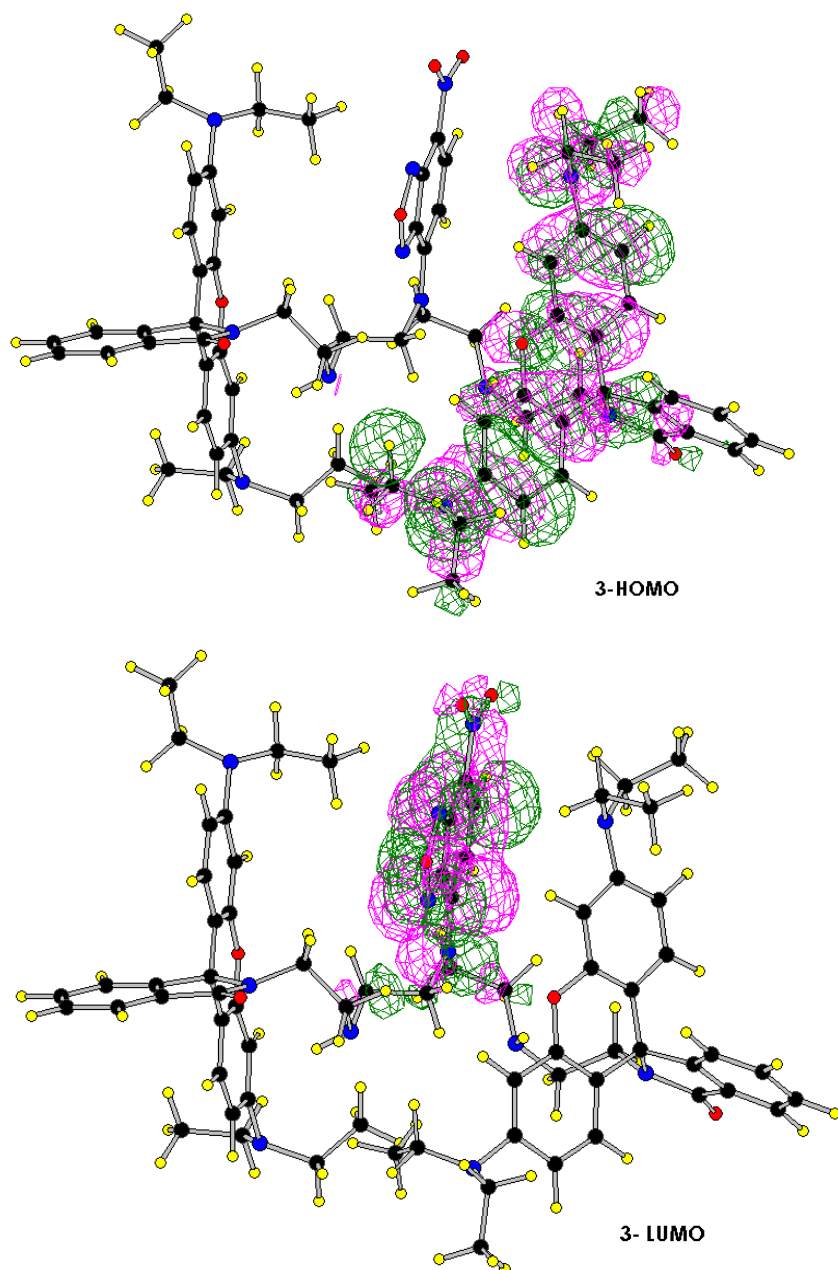

There are various photo-physical processes operative simultaneously. The Photoinduced electron transfer process can occur from the donor amino N-atom to either the (a) nitro acceptor group of benzofurazan or (b)  $\pi$ -acceptor of the Rhodamine. The feasibility and the effectiveness of PET processes can be evaluated from the theoretical calculations. The electron density map and  $\Delta E_{\text{HOMO-LUMO}}$  (eV) provide the vital information here as the  $\Delta E_{\text{HOMO-LUMO}}$  (eV) of the **1** was found to be approximately equal to that of **1X**.

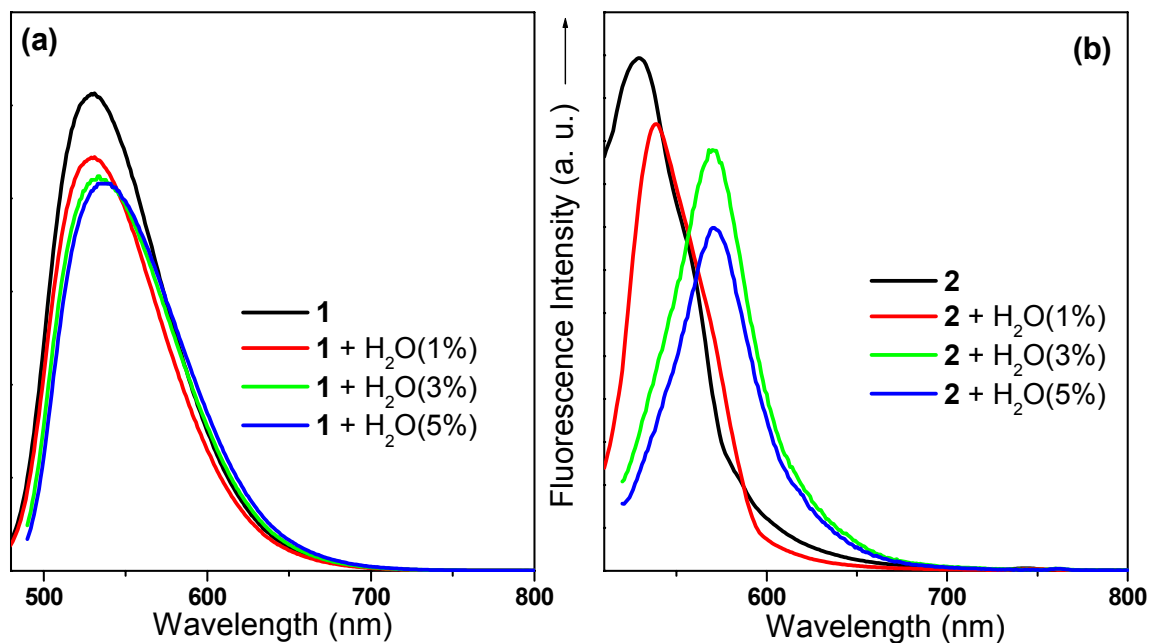

**Figure S27.** Emission spectra of (a) **1** and (b) **2** in presence of H<sub>2</sub>O in MeCN. Concentration of the ligands =  $1 \times 10^{-6}$  M, added water in % of v/v with MeCN given in the parenthesis.

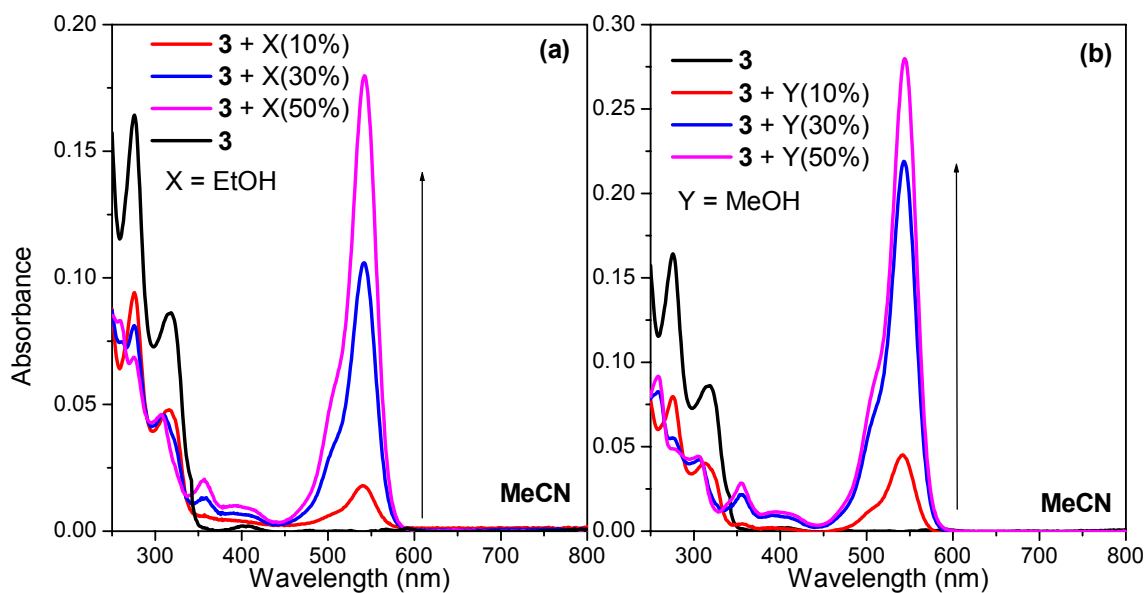

**Figure S28.** Absorption spectra of **3** in presence of (a) Ethanol and (b) MeOH in MeCN. [conc. =  $1 \times 10^{-6}$  M].



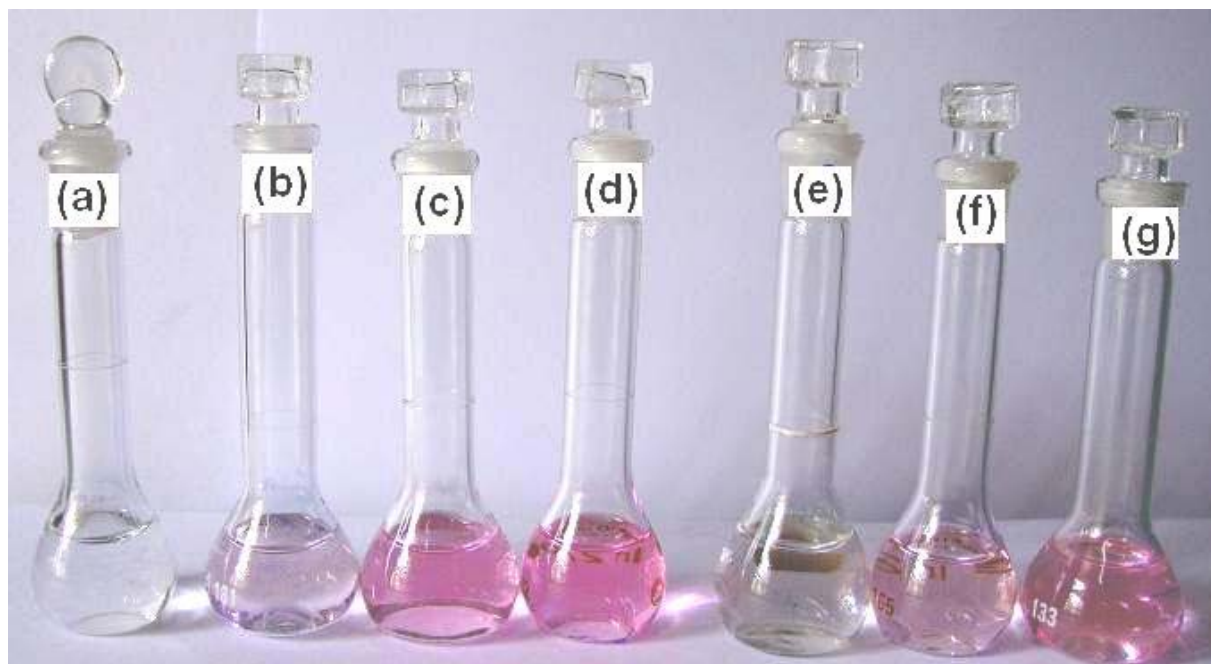

**Figure S29.** Photographs of **3** alone (a) and in presence of (b) MeOH (10 % v/v), (c) MeOH (30% v/v), (d) MeOH (50 % v/v), (e) EtOH (10 % v/v), (f) EtOH (30 % v/v) and (g) EtOH (50 % v/v) in MeCN [conc.  $1 \times 10^{-6}$  M].

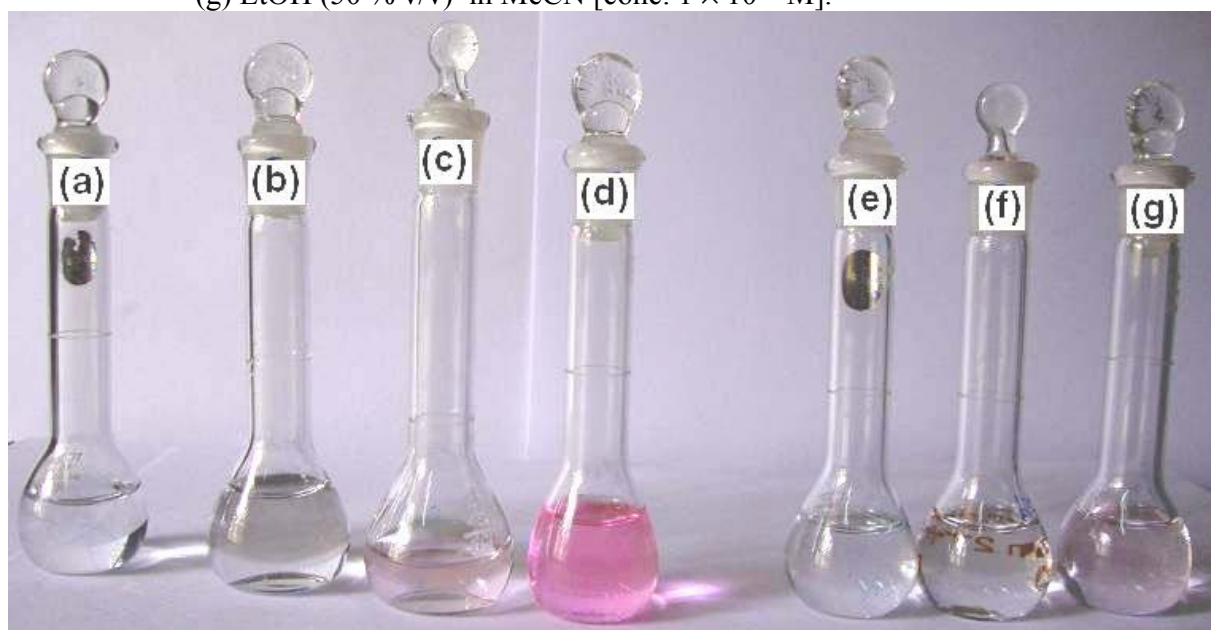

**Figure S30.** Photographs of **3** alone (a) and in presence of (b) MeOH (10 % v/v), (c) MeOH (30% v/v), (d) MeOH (50 % v/v), (e) EtOH (10 % v/v), (f) EtOH (30 % v/v) and (g) EtOH (50 % v/v) in THF [conc.  $1 \times 10^{-6}$  M].



The absorption spectral(Fig. S15, S25, and S28) pattern and corresponding photographs(Fig. S29, S30) of the micromolar solution of **3** reveals that few protic solvents such as methanol and ethanol also induce spiro-ring opening of **3** as seen in case with H<sub>2</sub>O. The comparative absorption spectral pattern reveal that even a small amount of H<sub>2</sub>O (3-5 % v/v) results in higher absorption and colour than 50 % v/v of those protic solvents. This infers to a water induced ring opening of spiroactam of **3** with a concentration threshold 3-5 % v/v in organic solvents such as MeCN and THF, where as solvent assisted ring-opening of the spiro-structure occurs as a function of solvent polarity in the case of protic solvents (MeOH and EtOH) in mixed solvents media. The emission spectral pattern follow similar trend as that of the absorption spectra.

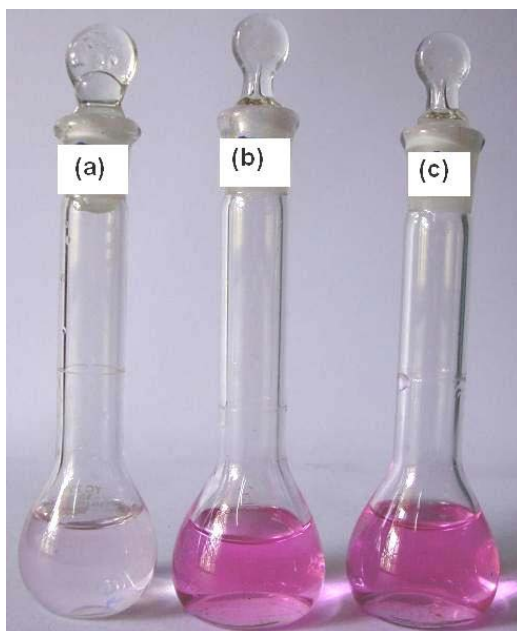

**Figure S31.** Photographs of **3** in (a) pH 4.0 (b) 7.0 and (c) pH 9.2 [conc. =  $1 \times 10^{-6}$  M].

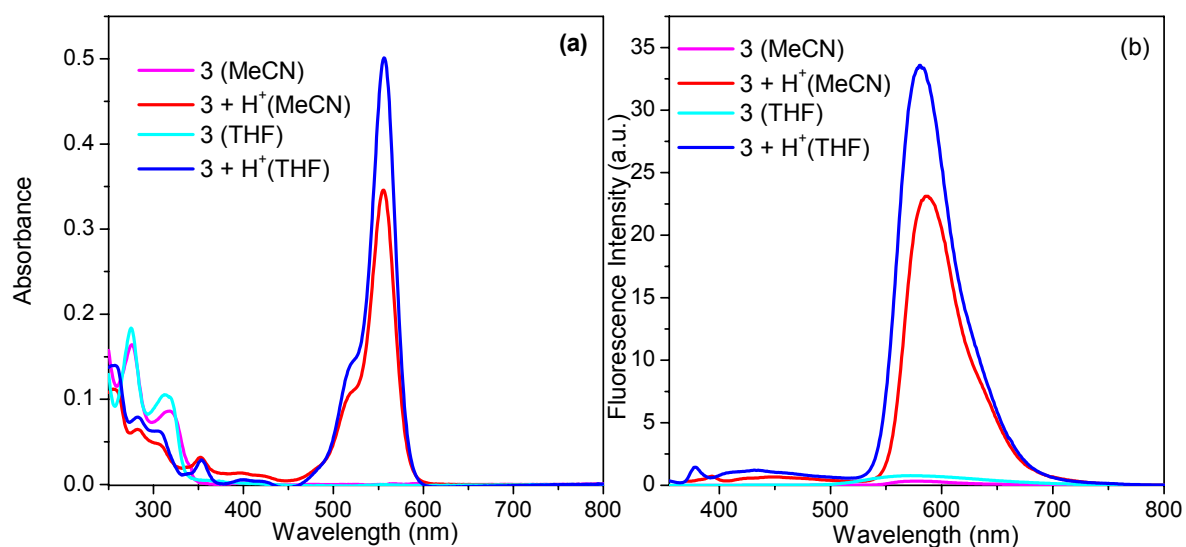

**Figure S32.** (a) Absorption and (b) emission spectra of **3** alone and in presence of H<sup>+</sup> (TFA) in different solvents, conc. =  $1 \times 10^{-6}$  M. (The fluorescence intensity has been scaled down by a factor  $10^6$  for clarity).

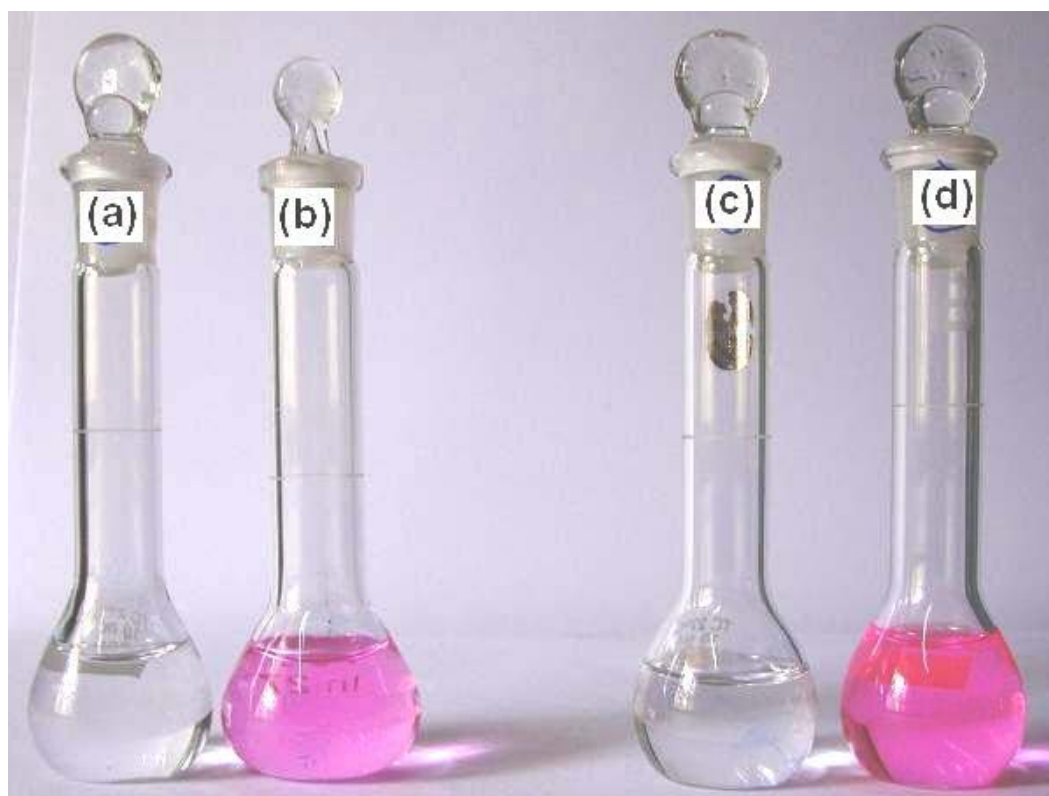

**Figure S33.** Photographs of **3** alone in (a) MeCN, (c) THF and in presence of H<sup>+</sup> in MeCN (b) and in THF (d) [conc.  $1 \times 10^{-6}$  M].
